## 50 An improved plant toolset for high-throughput recombineering

51  
52 Brumos J.<sup>a,1</sup>, Zhao C.<sup>a,1</sup>, Gong Y.<sup>a,b</sup>, Soriano D.<sup>a,c</sup>, Patel A.P.<sup>a</sup>, Perez-Amador M.A.<sup>a,d</sup>, Stepanova  
53 A.N.<sup>a</sup>, Alonso J.M.<sup>a,2</sup>

54  
55 <sup>a</sup> Department of Plant and Microbial Biology, Program in Genetics, North Carolina State  
56 University, Raleigh, NC, USA

57 <sup>b</sup> Department of Biology, Stanford University, Stanford, CA, USA

58 <sup>c</sup> Department of Biomedical Engineering, Duke University, Durham, NC, USA

59 <sup>d</sup> Instituto de Biología Molecular y Celular de Plantas (IBMCP), Universidad Politécnica de  
60 Valencia (UPV)-Consejo Superior de Investigaciones Científicas (CSIC), Valencia, Spain

61 <sup>1</sup> These authors contributed equally to this work

62 <sup>2</sup> Address correspondence to [jmalonso@ncsu.edu](mailto:jmalonso@ncsu.edu)

### 63 64 Abstract

65  
66 Gene functional studies often rely on the expression of a gene of interest as transcriptional and  
67 translational fusions with specialized tags. Ideally, this is done in the native chromosomal  
68 contexts to avoid potential misexpression artifacts. Although recent improvements in genome  
69 editing make it possible to directly modify the target genes in their native chromosomal  
70 location, classical transgenesis is still the preferred experimental approach chosen in most gene  
71 tagging studies because of its time efficiency and accessibility. We have developed a  
72 recombineering-based tagging system that brings together the convenience of the classical  
73 transgenic approaches and the high degree of confidence in the obtained results provided by  
74 the direct chromosomal tagging achievable by genome editing strategies. These simple and  
75 customizable recombineering toolsets and protocols allow for high-throughput generation of a  
76 variety of genetic modifications. In addition, a highly efficient recombinase-mediated cassette  
77 exchange system has been developed to facilitate the transfer of the desired sequences from a  
78 BAC clone to a transformation-compatible binary vector, expanding the use of the  
79 recombineering approaches beyond *Arabidopsis*. The utility of this system is demonstrated by  
80 the generation of over 250 whole-gene translational fusions and 123 *Arabidopsis* transgenic  
81 lines corresponding to 62 auxin-related genes, and the characterization of the translational  
82 reporter expression patterns for 14 auxin biosynthesis genes.

### 83 84 INTRODUCTION

85  
86 The last few years have witnessed dramatic advances in high-throughput experimental and  
87 computational approaches to investigate the molecular mechanisms behind biological  
88 processes. Nevertheless, certain types of information-rich functional data are still exceedingly  
89 tedious and time-consuming to obtain. Thus, any experimental approaches that require *in vivo*  
90 expression of the gene of interest (GOI) to, for example, gather high-resolution spatiotemporal  
91 expression patterns, determine protein subcellular localization, or identify protein-protein and  
92 protein-DNA/RNA complexes, still heavily rely on classical restriction enzyme or recombination-  
93 based cloning strategies. Although these classical approaches are simple and accessible and,

94 therefore, widely used, they have several limitations regarding scalability and may suffer from  
95 uncertainty when trying to capture the native expression patterns and levels of the genes under  
96 investigation. This uncertainty comes from the need to choose the DNA sequences to be  
97 included in the construct with the risk that some unknown, but important, regulatory  
98 sequences may be left out. This is not a trivial problem when the native expression pattern of a  
99 GOI needs to be imposed on the tagged gene. In the absence of a strict criterium, more or less  
100 arbitrary lengths of DNA sequences (typically from 1 to 4 kb of sequences upstream and 1 kb or  
101 less of sequences downstream of the start and stop codon, respectively) or all of the intergenic  
102 sequences flanking the GOI, are usually chosen. These strategies, however, do not guarantee  
103 that all regulatory sequences are captured. Genetic complementation of a mutant line is relied  
104 upon to support that the expression patterns of the generated transgene accurately reflect that  
105 of the corresponding native gene. This time consuming and not fully foolproof approach is,  
106 however, not possible when either a mutant line is not available or, what is most common,  
107 when the mutant does not display any detectable phenotype. The obvious solution to this  
108 problem is to increase the size of the sequences flanking the GOI that would be included in the  
109 transgene or, even better, to insert the tag or the desired modification in the GOI directly in its  
110 native chromosomal location. Although the latter genome-editing approach is highly desirable  
111 and the number of reports of precise gene editing in plants is constantly increasing ((Cermak et  
112 al., 2015; Begemann et al., 2017; Yu et al., 2017; Dahan-Meir et al., 2018; Li et al., 2018) and  
113 reviewed in (Soyars et al., 2018), the transgenic approach is still the most widely used  
114 methodology to generate plants expressing genes carrying a tag or other modifications that  
115 facilitate their visualization or biochemical characterization. Classical transgenic approaches are  
116 not ideal either, as they become tedious and inefficient as the size of the DNA fragments used  
117 increases.

118  
119 To overcome the limitations of traditional transgenic approaches, highly efficient homologous  
120 recombination in bacterial strains engineered to express the Exo, Beta and Gam proteins from  
121 the lambda phage, also known as lambda red recombineering system (Yu et al., 2000; Copeland  
122 et al., 2001), have been developed. The high efficiency of this recombineering system has made  
123 it an essential tool in bacterial genome engineering (Isaacs et al., 2011) allowing for the rapid,  
124 efficient and simultaneous editing of hundreds of loci in the bacterial genomes. Although the  
125 lambda red system has not been shown to work in eukaryotic cells, DNA from higher organisms  
126 can be efficiently modified using this system when introduced into recombineering-ready *E. coli*  
127 strains. Thus, recombineering has been successfully used to generate genome-wide collections  
128 of fluorescently tagged proteins in several model organisms, such as *Drosophila* and *C. elegans*  
129 (Sarov et al., 2012; Sarov et al., 2016). In addition to the *E. coli* recombineering strains  
130 (Warming et al., 2005), several other system-specific elements are required in order to make  
131 this technology accessible to a research community. First of all, a collection of sequence-  
132 indexed genomic clones covering the whole genome of the organism of interest needs to be  
133 available. This is essential to easily identify a clone containing a GOI and the flanking sequences  
134 containing all of the putative regulatory sequences for that gene. In the case of plants, the  
135 reintroduction of these large genomic DNA fragments into the plant genome typically requires  
136 the use of *Agrobacterium*-mediated transformation. This imposes an additional requirement  
137 that the vector carrying the large genomic DNA fragments should be compatible with

138 *Agrobacterium*-mediated transformation. Alternatively, the large DNA fragments from a  
139 bacterial artificial chromosome (BAC) would need to be transferred to a suitable binary vector  
140 (Bitrian et al., 2011). In addition, unrestricted availability of a set of reusable recombineering  
141 cassettes suitable for the insertion of tags commonly used in plant research at any position in  
142 any GOI, as well as tools that allow for the generation of custom-designed tagging cassettes or  
143 the introduction of any other sequence modifications in the genes of interest, are essential for  
144 the popularization of this technology among plant biologists. Finally, robust and simple  
145 protocols to facilitate the use of recombineering in any plant biology research lab with a  
146 standard molecular biology setup, as well as scalable pipelines that allow for the  
147 implementation of this technology to entire gene families, pathways or the even the whole  
148 genome is essential for the plant community to take full advantage of the benefits offered by  
149 the recombineering technology.

150  
151 Previously, we have shown that recombineering could be used to generate whole-gene  
152 translational fusions and point mutations in genes harbored in transformation-ready bacterial  
153 artificial chromosomes (TACs) and that these large TAC clones could be used for  
154 *Agrobacterium*-mediated transformation (Zhou et al., 2011). However, this original system has  
155 several limitations. First, it requires a sequence-indexed collection of TAC clones, in practice  
156 restricting its use to *Arabidopsis*. It also employs classical recombineering cassettes based on  
157 the selectable *galk* system (Warming et al., 2005) that relies on specialized media and  
158 expensive reagents (Warming et al., 2005). In addition, the relatively low efficiency of the  
159 contra-selection steps used to replace the *galk* gene by the tag of interest precludes this  
160 approach from being scaled up and requires significant troubleshooting when first adopted in a  
161 lab. Herein, we present a new set of tools and protocols that overcome all of these limitations.  
162 Namely, the new plant recombineering kit we describe here allows for the use of standard  
163 media and antibiotic selection, it provides a set of ready-to-use tags and a vector that can be  
164 utilized to convert any tag of interest into a recombineering-ready cassette. Importantly, a new  
165 set of plasmids and cassettes has been generated to facilitate the transfer of tens of thousands  
166 of base pairs from a BAC to a high-capacity binary vector, opening this technology to many  
167 plant species for which sequence-indexed genomic clones covering the genome are available.  
168 Finally, we have compiled sequence information from two *Arabidopsis* TAC libraries into a  
169 public genome browser allowing for the easy identification of TAC clones containing the  
170 *Arabidopsis* GOI. All of the vectors and cassettes required to carry out recombineering  
171 experiments in plants are available via the ABRC, while the JAtY and Kazusa TAC libraries (Hirose  
172 et al., 2015) are available from the ABRC and RIKEN BRC public stock centers. To demonstrate  
173 the utility of this system, we have tagged over 250 genes with different tags. We have made  
174 publicly available 123 transgenic lines corresponding to 62 genes through the ABRC and NASC.  
175 Among these lines are those corresponding to *GUS* translational fusions of all members of the  
176 *TAA1/TAR* and *YUC* auxin biosynthetic enzyme families implicated in the production of auxin,  
177 indole-3-acetic acid (IAA), from amino acid tryptophan via indole-3-pyruvic acid (IPyA). The  
178 characterization of these lines in the roots and hypocotyls of seedlings grown under different  
179 pharmacological treatments, as well as in untreated inflorescences and flowers, provides a  
180 detailed and comprehensive map of the auxin biosynthetic machinery.

181

182

## 183 RESULTS

184

### 185 Generation of excisable antibiotic-based recombineering cassettes

186

187 Classical recombineering strategies (Warming et al., 2005; Zhou et al., 2011) rely on two  
188 consecutive recombineering steps. In the first step, a positive-negative selectable marker such  
189 as *galK* is inserted in the genomic location to be modified, followed by a second recombineering  
190 step where *galK* is substituted by the desired tag or replacement sequence (Figure 1). One  
191 drawback of this time-consuming approach is that the negative selection step is prone to false  
192 positives (Warming et al., 2005; Zhou et al., 2011) and often several colonies per construct need  
193 to be tested to identify a true recombination product with the desired changes. An alternative  
194 approach to reduce the number of recombineering reactions needed has been the use of  
195 bifunctional recombineering cassettes that contain both the tag to be inserted in the GOI and a  
196 positive/negative selectable marker. This selectable marker is flanked by *flipase* (*FLP*)  
197 recognition target sites (*FRTs*) (Tursun et al., 2009) (Figure 1), thus enabling marker removal by  
198 activating the expression of a *FLP* recombinase with very high efficiency (Warming et al., 2005).  
199 In this alternative recombineering system, the positive selectable marker is first used to identify  
200 insertion events of the recombineering cassette in the GOI. An inducible *FLP* recombinase  
201 already engineered in some *E. coli* recombineering strains, such as SW105, is then used to  
202 trigger the excision of the selectable marker leaving behind just the reporter gene and a 36 nt  
203 *FRT* scar. The identification of these excision events can be facilitated by the loss of the *galK*  
204 activity that in the presence of 2-deoxy galactose inhibits bacterial growth (Warming et al.,  
205 2005). With the final goal to facilitate the use of recombineering and to allow for increased  
206 throughput, we have also adopted and improved the bifunctional cassettes containing both a  
207 selectable marker and a tag of interest. Although initially we chose the classical *galK* selectable  
208 marker to generate these bifunctional cassettes due to its counter-selectable capabilities  
209 (Warming et al., 2005; Zhou et al., 2011), we later generated a simplified and easier-to-use  
210 antibiotic-based excisable bifunctional recombineering cassette (Alonso and Stepanova, 2014)  
211 to better exploit the high efficiency of the *FLP*-based excision system already engineered into  
212 the SW105 recombineering strain genome. Here, we have expanded the collection of  
213 bifunctional recombineering cassettes to a total of 11. These new antibiotic-based cassettes  
214 consist of several of the most commonly used tags in plants and an antibiotic resistance gene  
215 flanked by the *FRT* sites (Figure1, Table S5). In addition to simplifying and accelerating the  
216 selection of recombination events, these ampicillin- or tetracycline-based recombineering  
217 cassettes are compatible not only with the selectable markers of two end-sequenced TAC  
218 libraries in *Arabidopsis* (Zhou et al., 2011; Hirose et al., 2015), but also with the most popular  
219 plant BAC libraries that use kanamycin or chloramphenicol as the antibiotic selection in bacteria  
220 (Budiman et al., 2000; Yuan et al., 2000; Zhang et al., 2016). In addition, several fluorescent  
221 protein gene and *GUS* tags incorporated in these new cassettes have been codon-optimized for  
222 high expression in plants (Table S5).

223

224 Importantly, all our recombineering cassettes share the same 5' and 3' universal adaptor  
225 sequences (Table S5). These sequences common to all our constructs serve two purposes. On

226 the one hand, these adaptor sequences allow for the use of the same set of gene-specific  
227 60mer primers to tag a GOI with any of the different tags in the collection. On the other hand,  
228 the in-frame adaptor sequences encode a poly-glycine and a poly-alanine linker, providing a  
229 flexible connection, and thus minimizing conformational interferences between the protein of  
230 interest and the corresponding tag (Tian et al., 2004). Finally, these adaptors have been  
231 designed to allow the same cassettes to be used in N-terminal, C-terminal or internal  
232 translational fusion experiments.

233  
234 Although the new antibiotic-based recombineering cassettes make the generation of the  
235 translational fusions much simpler and more efficient, they do not allow for the same level of  
236 flexibility as provided by the classical *galk* system. Thus, for example, the counter-selectable  
237 properties of *galk* can be used, once inserted in the GOI, to generate replacement  
238 recombination events between the native sequence and any linear DNA fragment flanked by  
239 short (>40nt) homology arms (Figure 1). In contrast, this sort of sequence modifications cannot  
240 be done with our native excisable antibiotic-based system where one recombineering cassette  
241 needs to be constructed for each new tag. In order to bypass this limitation and, at the same  
242 time, to further facilitate the generation of new recombineering cassettes, we have developed  
243 two new recombineering cassettes, a *Universal tag-generator* cassette (where the counter-  
244 selectable marker *RPSL* allows for the selection of DNA replacement events in the presence of  
245 streptomycin) and a *galk-FRT-Amp-FRT* cassette (where *galk* can be employed as a contra-  
246 selectable marker) (Figure 2, Table S5). These two cassettes can be used to facilitate the  
247 addition of new tags to our collection of bifunctional recombineering cassettes by simply  
248 replacing the *RPSL* or the *galk* sequences by the sequence of a new tag, or to generate nearly  
249 any types of gene editing events, from single nucleotide modifications to large deletions, by  
250 replacing the whole cassette by the sequence of interest by recombineering (Figure 2)  
251 (Stepanova et al., 2011; Brumos et al., 2018). As a proof of concept, we have used the *Universal*  
252 *tag-generator* cassette to create a new *RFP* recombineering cassette and the *galk-FTR-Amp-FRT*  
253 to generate the *GFP*, *mCherry* and *3xMYC* recombineering cassettes (Table S5).

## 254 255 **Recombineering-based trimming and transfer of large genomic constructs from BACs to** 256 **binary vectors**

257  
258 As indicated above, the ability to precisely edit the sequence of a GOI in the context of a large  
259 BAC has the great advantage of capturing distant (even tens of thousands of base pair away)  
260 regulatory sequences and, thus, preserving the native expression patterns in the transgene  
261 reporter fusions. The use of BACs containing the GOI as the source of the genomic sequences to  
262 be edited has, however, several critical drawbacks. First, the researcher does not have the  
263 flexibility to choose the exact DNA regions flanking the GOI that would be included in the final  
264 construct, as this would be determined by the sequences already present in the selected BAC  
265 clone. Second, the choice of sequence-indexed BACs containing the GOI is limited by what  
266 clones are available in the BAC collection. Additionally, in most plant species (with probably the  
267 sole exception of *Arabidopsis*), the BAC clone collections that have been mapped back to the  
268 genome cannot be directly used for *Agrobacterium*-mediated transformation, as the vectors  
269 used in various genome sequencing efforts lack the features for propagation in *Agrobacterium*

270 and for the subsequent transfer of DNA from the bacteria to the plant genome. To circumvent  
271 these limitations, we have developed a set of antibiotic-selection-based recombineering  
272 “trimming cassettes” (Figure 3, Table S5) that allow for the efficient elimination of undesired  
273 sequences flanking the GOI (Figure 3A). This simple trimming procedure allows the researcher  
274 to precisely define the DNA regions flanking the GOI to be included in the final construct  
275 (assuming a BAC clone containing the desired regions has been identified), thus eliminating  
276 extra genes that may cause phenotypic alterations when present in a copy-number excess. An  
277 added advantage of this strategy is that by reducing the size of the final construct, the  
278 transferring efficiency of the desired edited sequences to the plant nuclear genome is also  
279 increased (Zhou et al., 2011; Brumos et al., 2018).

280  
281 In addition to the antibiotic resistance markers present in these trimming cassettes, we have  
282 also included two sets of orthogonal *FRT* sites (*FRT2* in the tetracycline and *FRT5* in the  
283 ampicillin cassettes, respectively (Schlake and Bode, 1994)), thus allowing for the removal of  
284 the antibiotic resistance genes once the trimming has been completed. Importantly, after the  
285 *FLP*-mediated excision of the antibiotic resistance genes, the two remaining *FRT2* and *FRT5* sites  
286 left in the construct display a head-to-tail orientation. As illustrated in Figure 3B and S1, this *FRT*  
287 configuration allows for the transfer of the selected DNA flanked by the *FRTs* to an engineered  
288 binary vector (see below) through an *in vivo* cassette-exchange reaction ((Turan et al., 2013)  
289 and Figure 3B and S1). To carry out the transfer of BAC DNA to any Gateway-compatible binary  
290 vector, we have constructed a pDONR221-based entry clone with the negative selectable  
291 marker *SacB* flanked by the *FRT2* and *FRT5* sites in the same head-to-tail configuration as in the  
292 trimmed BAC (Figure 3B, Table S5). This *FRT2-SacB-FRT5* cassette can now be transferred to any  
293 *attR1-attR2*-containing destination vector using the standard LR Gateway recombination  
294 system, making it capable of accepting an *FRT2/FRT5*-flanked insert from any BAC clone.

295  
296 One possible advantage of this *in vivo FLP*-based cassette exchange system relative to the *in*  
297 *vitro* systems such as Gateway is the higher upper size limit of DNA fragments that can be  
298 routinely mobilized between vectors. Following this strategy, we have generated a pGWB1-  
299 *FRT2-SacB-FRT5* as a standard destination vector for our *FLP*-mediated cassette exchange  
300 reactions (Figure 3B, Table S5). To test the efficiency of the *FLP*-based system to exchange large  
301 DNA fragments, we tested the ability to transfer DNA fragments of ~16, ~37 and ~78 kb from a  
302 BAC containing the *YUC9-GUS* translation fusion gene to the pGWB1-*FRT2-SacB-FRT5* binary  
303 vector. Although we were able to transfer all three DNA fragments, we found that the efficiency  
304 of the transfer dropped considerably as the DNA fragment size increased (Table 1). We  
305 reasoned that this could be due to a compromised stability of very large constructs in a  
306 multicopy plasmid such as pGWB1 not designed to hold such large DNA inserts. To overcome  
307 such limitation, we engineered pYLAC17, a low-copy vector designed for the generation of  
308 large-insert genomic TAC libraries (Liu et al., 2002), to carry the exchange cassette *FRT2-SacB-*  
309 *FRT5*, allowing for the transfer, stable propagation, and plant transformation of large fragments  
310 of DNA originally carried in a BAC clone (Figure S1, Table S5). Furthermore, to expand the  
311 spectrum of BAC libraries that can be used as a DNA donor in this system, we introduced *aadA*,  
312 an *aminoglycoside 3'-adenylyltransferase* gene that confers spectinomycin and streptomycin  
313 resistance in both in *E. coli* and *Agrobacterium*, in addition to the kanamycin-resistance gene

314 already present in the pYLAC17-FRT2-SacB-FRT5-Spect vector (see Methods) (Figure S1, Table  
315 S5). We have also generated a second version of this vector pYLAC17-FRT2-SacB-FRT5-Spect-  
316 Kan where the *Bar* gene for phosphinothricin (Basta) resistance has been replaced by the *NPTII*  
317 gene for kanamycin selection in planta (Figure S1, Table S5). Using the pYLAC17-FRT2-SacB-  
318 FRT5-Spect plasmid side-by-side with the pGWB1-FRT2-SacB-FRT5 vector, we observed in two  
319 independent experiments (see Table 1) that the efficiency of DNA transfer from the BAC to  
320 pYLAC17-FRT2-SacB-FRT5-Spect was higher than that to pGWB1-FRT2-SacB-FRT5-Spect as the  
321 acceptor vector, especially for DNA fragments as large as 78kb.

322

### 323 **High-throughput recombineering using highly efficient FLP-based marker excision cassettes**

324

325 In the post-genome era, with thousands of gene sequences available, scalability represents a  
326 key element of any experimental procedure that aims to facilitate gene functional analysis.  
327 With the goal of developing a simple pipeline to process 96 recombineering samples in parallel  
328 (Figure 4 and Methods), different bottlenecks were identified. The first challenge was the  
329 development of an efficient method to transfer 96 TAC clones from the original *E. coli* strain  
330 DH10B to the recombineering strain of *E. coli*, SW105. This problem was addressed by growing  
331 the 96 DH10B strains in a 96-deep-well plate overnight and carrying out standard home-made  
332 alkaline lysis miniprep (Alonso and Stepanova, 2014) in a 96-well format. Critical to the  
333 robustness of this procedure was the gentle manipulation of the TAC DNA (e.g., no vortexing or  
334 freezing) to avoid breaks or nicks that would result in the loss of its supercoiled conformation  
335 and a drastic decrease in its transformation efficiency. Towards the same objective of  
336 maintaining the supercoiled conformation of the TAC DNA, electroporation was carried out  
337 immediately after the DNA purification procedure was finished. Electrocompetent SW105 cells  
338 were freshly prepared using standard procedures and electroporation carried out using a 96-  
339 well-format electroporator (Alonso and Stepanova, 2014). Cells corresponding to individual  
340 clones were then plated and individual colonies tested for the presence of the correct TAC  
341 clone by PCR using gene-specific primers. A similar strategy was used to transfer the TAC clones  
342 from *E. coli* SW105 to the *recA*-*Agrobacterium* UIA143 pMP90 once the desired modifications  
343 had been introduced into the genes of interest and the constructs confirmed by PCR and  
344 sequencing. The next critical step that needed to be scaled up was the insertion of the tag in  
345 the desired locations in each of the 96 selected genes. PCRs with a 60mer primer pair  
346 containing 40 nucleotides flanking the insertion site of the GOI and 20 nucleotides  
347 corresponding to the universal adaptors flanking the recombineering cassette were used to  
348 obtain the 96 gene-indexed recombineering amplicons. Key for the implementation of this high-  
349 throughput procedure was the experimental design of a strategy that would allow for an  
350 efficient introduction of 96 different recombineering cassettes into 96 different SW105 strains  
351 carrying the individual BACs of interest without the need to having to individually prepare  
352 electrocompetent cells for each of the 96 SW105 strains. This was achieved by preparing  
353 electrocompetent cells from pools of 12 strains corresponding to a full row in the 96-well plate  
354 in such a way that 96 TAC clones were represented in 8 non-redundant pools of competent cells  
355 per plate. Each of these pools of competent cells was divided in 12 identical aliquots, with each  
356 aliquot electroporated with one of the 12 amplicons containing the 40 nt flanking sequences  
357 specific for one of the 12 targets contained in this pool (Figure 4). Due to the high sequence

358 specificity of the recombination events, only those cells in a pool carrying the gene  
359 corresponding to the particular gene-indexed recombineering amplicon can undergo  
360 recombination and, therefore, acquire the selectable marker encoded in the cassette. For each  
361 of the 96 parallel recombination experiments, the fidelity of the recombination events was  
362 assayed by PCR using gene-specific primers flanking the selected insertion site with an  
363 efficiency of ~100%, as we have previously reported (Zhou et al., 2011). To excise the selectable  
364 marker, the 96 strains confirmed to carry the desired gene fusions were grown overnight in a  
365 96-deep-well plate. Cells from each well were then diluted 50-fold in 1 mL of fresh LB media in  
366 a new 96-deep-well plate and the *FLP* gene was induced by adding 10  $\mu$ L of 10% (w/v) L-  
367 arabinose per well. After 2h at 32°C, a sterile toothpick was used to streak a few cells in a solid  
368 media plate. For the first 96 constructs, we used the recombineering cassette containing the  
369 *galk* marker flanked by the *FRT* sites with the idea that the positive/negative selection of *galk*  
370 could be used to select for *galk*- clones after the *FLP*-mediated excision. Due to the extremely  
371 high efficiency of excision, we found the *galk* contra-selection unnecessary, as the desired  
372 excision events for most clones (see below) could be identified without the need for contra-  
373 selection. In fact, the analysis of three independent clones for each construct was sufficient in  
374 most cases to find at least one excision event lacking any undesired mutation (see below).  
375

376 As indicated above, the first 96 genes (Table S1) corresponding to hormone-related genes were  
377 tagged using a modified version of a previously developed (Tursun et al., 2009) *Venus-FRT-galk*-  
378 *FRT* cassette (Table S5) where we added the universal adapters mentioned above (Tian et al.,  
379 2004). From these 96 selected genes, we failed to generate the desired constructs in two cases  
380 where, after sequencing three independent clones, we were not able to identify a construct  
381 with the desired modifications. For 17 additional genes we had to sequence two clones to find  
382 the desired mutation-free construct, and in three cases a third clone had to be sequenced. As  
383 we have previously described (Zhou et al., 2011), most of the observed mutations were found  
384 in the sequences corresponding to the long oligos used to amplify the recombineering  
385 cassettes. After sequence verification, 80 out of 94 clones were successfully transferred to a  
386 *recA*- *Agrobacterium* strain UIA143 pMP90 (Hamilton, 1997) using our 96-well-plate pipeline  
387 described above (Figure 4 and Methods). In the 14 cases we did not succeed to transfer the TAC  
388 clone to *Agrobacterium*, we did observe *Agrobacterium* colonies growing in kanamycin-  
389 selectable media, but they tested negative for the presence of the tagged gene by PCR (see  
390 below).  
391

392 Importantly, as mentioned above, we observed that the efficiency of *FLP*-based excision of the  
393 *galk* cassette was ~100% efficient, even in the absence of counter-selection conditions,  
394 indicating that the positive/negative selectable marker *galk* could be replaced by a much more  
395 convenient antibiotic-based positive-only selection marker, allowing for the use of standard  
396 growth media (instead of the minimal media required in the *galk* system). In addition to  
397 lowering the complexity and cost of the recombineering experiments, the use of antibiotic-  
398 based cassettes also reduces significantly the time required for *E.coli* to grow in the selectable  
399 media, going from 5 days for the *galk* selection in M63 minimal media to 2 days (as the  
400 recombineering strains need to be grown at 32°C to avoid the induction of the lambda red  
401 proteins) for the antibiotic-based selection in standard LB media (Figure 1). To test the utility of



402 these antibiotic-based recombineering cassettes, we generated the *Universal AraYpet-FRT-*  
403 *Amp-FRT* cassette and used it to tag another set of 96 genes (Table S5 and S2). In this second  
404 experiment, we included most of the genes in the shikimate and shikimate-derived metabolic  
405 pathways, focusing on those related to auxin biosynthesis. Similar to the *galk*-based system, we  
406 were able to obtain mutation-free constructs for most of the genes (89 out of 96) and transfer  
407 them to *Agrobacterium* in 79 out of the 89 cases. Although we are not sure what the problem  
408 was in the 12 cases where the *Agrobacterium* transformation failed, in a follow-up study we  
409 have found that by adding *aadA* (Sandvang, 1999) as a second antibiotic selectable marker we  
410 can eliminate false positives during the transfer of large TAC clones from *E. coli* to  
411 *Agrobacterium* (see below), thus improving the efficiency of selection of TAC clones in  
412 *Agrobacterium* to ~100%.

413  
414 All 159 *Venus* or *Ypet* constructs transferred to *Agrobacterium* were used to transform  
415 *Arabidopsis* using the highly efficient floral dip method but replacing the sucrose by glucose to  
416 prevent toxicity in some *Agrobacterium* strain where the *SacB* gene was still active (Zhou et al.,  
417 2011). To facilitate the plant transformation process of the large number of constructs  
418 generated, the 159 *Agrobacterium* strains were grown in solid media (two 150 mm Petri dishes  
419 per construct) and *Agrobacterium* cells were then harvested in transformation media just  
420 before performing the floral dip (see Methods for more details). Of these 159 constructs, we  
421 have generated and deposited in the stock center *Arabidopsis* transgenic lines for 33 genes  
422 (two independent lines for 31 of these genes and one single line for the other two) (see Tables  
423 S1-S3 for accession number information). This subset of lines was selected based on an initial  
424 screen of young T1 seedlings with positive fluorescence signal and subsequent PCR  
425 confirmation of the desired genotype. We decided to prioritize this relatively small subset of  
426 genes due to the resources that would be needed for (and the logistic challenges that would be  
427 involved in) the propagation, making homozygous, and subsequent characterization of several  
428 lines per construct for which no evidence of detectable fluorescence and, therefore, future  
429 utility was readily available. The lack of detectable expression of the reporter gene could be due  
430 to several factors. On the one hand, we have observed that rates of deletions of the TAC  
431 constructs during the plant transformation process could be quite significant for large  
432 constructs, while negligible for constructs smaller than 25kb (Zhou et al., 2011). Additional and  
433 probably a more significant factor is the low expression/accumulation levels of many of the  
434 tagged proteins. To offset the first problem, we could either identify by PCR transgenic lines  
435 containing the whole transgene including both ends of the T-DNA, as we have done previously  
436 (Zhou et al., 2011), or we could trim distal genomic sequences unlikely to contain regulatory  
437 elements affecting the expression of the GOI but present in the original TAC clones. Much more  
438 difficult to circumvent is the problem of lack of detectable fluorescence signal due to low levels  
439 of expression. To try to alleviate these two problems derived from using large TAC clones and  
440 weak fluorescence signal from low expressed genes, we selected 87 of previously tagged genes  
441 related to auxin biosynthesis, transport and response and generated new recombineering  
442 constructs tagged with three copies of the bright fluorescent protein gene *Ypet* (Table S5, and  
443 S3). Towards this end, we made a new codon-optimized, *FLP*-based, ampicillin-resistant,  
444 excisable recombineering cassette (Table S5). At the same time, all these new constructs were  
445 also trimmed to reduce the insert to just the tagged gene and 15kb of flanking sequences (10kb

446 upstream of ATG and 5 kb downstream of the stop codon) using the trimming tools described  
447 above.

448

#### 449 **Characterization of expression patterns for *TAA1/TAR* and *YUC* genes**

450

451 To further demonstrate the utility of this high-throughput recombineering system, we  
452 employed a new codon-optimized *GUS* recombineering cassette to tag the 14 auxin  
453 biosynthetic genes of the IPyA pathway (Table S3): *TAA1*, *TAR1*, *TAR2*, and *YUC1* to *YUC11*.  
454 *TAA1* and *TARs* encode tryptophan aminotransferases that catalyze the synthesis of IPyA from  
455 tryptophan (Stepanova et al., 2008; Tao et al., 2008), whereas *YUC1* to *YUC11* are flavin  
456 monooxygenases that convert IPyA to IAA (Sugawara et al., 2009; Stepanova et al., 2011). We  
457 generated transgenic plants for all 14 genes and examined expression patterns of translational  
458 fusions in seedlings and reproductive tissues (Figures 5, 6, 7).

459

460 In roots of three-day-old dark-grown seedlings germinated in control AT media, we could detect  
461 the expression of translational fusions with *GUS* for *TAA1* and four out of eleven *YUCs* (*YUC3*,  
462 *YUC7*, *YUC8*, and *YUC9*) in the primary root meristem, as well as *TAA1* and *YUC6* in the pre-  
463 vasculature (Figure 5). Treatments with the auxin transport inhibitor naphthylphthalamic  
464 acid (10  $\mu$ M NPA), ethylene precursor 1-aminocyclopropane-1-carboxylic acid (10  $\mu$ M ACC),  
465 NPA and ACC combined, or synthetic auxin naphthaleneacetic acid (50 nM NAA) enabled the  
466 detection of root expression of all three *TAA1/TAR* genes and nine out of eleven *YUCs*, except  
467 for *YUC1* and *YUC10* that were not expressed in distal regions of the primary root of three-day-  
468 old etiolated plants in any of the conditions tested. ACC treatment upregulated *TAA1*, *TAR1*,  
469 *TAR2*, *YUC2*, *YUC3*, *YUC4*, *YUC5*, *YUC6*, *YUC8*, *YUC9*, and *YUC11*, consistent with the induction of  
470 the auxin responsive reporter *DR5:GUS* (Figure 5) and the known stimulatory effect of ethylene  
471 on auxin biosynthesis in roots (Stepanova et al., 2005; Ruzicka et al., 2007; Stepanova et al.,  
472 2007; Swarup et al., 2007). Germinating seedlings in the presence of NPA induced the levels of  
473 *TAA1*, *TAR2*, *YUC3*, *YUC5*, *YUC7*, *YUC8*, *YUC11*, and, accordingly, *DR5*, but the domains of NPA-  
474 triggered *GUS* activity were different for different genes. For example, for *TAA1* and *YUC5*, *GUS*  
475 staining in NPA was visible in the root elongation zones, suggesting that local auxin production  
476 is activated in this part of the root in response to the inhibition of polar auxin transport.  
477 Furthermore, the expression of *TAA1* in the developing vasculature and of *TAR2* in the stele was  
478 also enhanced by NPA. The domains of *YUC3* and *YUC8* in NPA became dramatically expanded  
479 in the primary root meristems, presumably leading to increased local production and  
480 accumulation of auxin in these tissues, as witnessed by the extensive widening of the *DR5:GUS*  
481 domains. The shift of the *DR5* maximum correlates with the previously reported broadening of  
482 the stem cell niche under NPA treatments (Sabatini et al., 1999). The re-patterning of the  
483 meristematic tissues is triggered by the increased levels of IAA trapped in the auxin-producer  
484 cells, with similar outcomes described for root meristems in plants exposed to an exogenous  
485 synthetic auxin, 2,4-D (Sabatini et al., 1999).

486

487 Combined NPA plus ACC treatment had additive or synergistic effects on the expression of  
488 *TAA1*, *TAR1*, *TAR2*, *YUC3*, and *YUC9* or, in the case of *YUC5*, *YUC6*, *YUC8*, phenocopied the single  
489 NPA treatments (Figure 5). Interestingly, in some cases, combined NPA plus ACC treatment

490 resulted in the loss of some of the subdomains of expression visible with ACC alone (e.g., GUS  
491 staining in root hairs for *YUC2*, *YUC3*, *YUC4*, *YUC5* and *YUC6*), or led to the shift in the domain of  
492 GUS activity, as seen for *TAR1*. Finally, the NAA treatment upregulated *TAA1* in the root  
493 elongation zone, *TAR2* and *YUC2* in the stele and root cap, *YUC3* in the entire root tip, *YUC6* in  
494 the vasculature, and *DR5:GUS* in the vasculature and the root meristem, suggesting that  
495 exogenous auxin can activate endogenous auxin biosynthesis. Of the 12 genes detectable in  
496 roots, only *YUC7* was not prominently responsive to any of the treatments tested (Figure 5).

497  
498 In shoots of three-day-old etiolated seedlings, *TAA1*, *TAR2* and five *YUC* genes, *YUC1*, *YUC3*,  
499 *YUC4*, *YUC5*, and *YUC6*, were expressed in control media, whereas *TAR1*, *YUC2*, *YUC7*, *YUC8*,  
500 *YUC10* and *YUC11* became detectable in seedlings exposed to ACC, NPA plus ACC, and/or NAA  
501 (Figure 6). The spatial domains of *GUS* reporter activity varied for different auxin biosynthesis  
502 genes. For example, in control conditions, *TAA1*, *YUC1*, *YUC4* and, to a lower extent, *TAR2* had  
503 defined expression in the shoot apical meristem, *TAA1* and *YUC6* were active in the hypocotyl  
504 vasculature, whereas *TAA1*, *TAR2* and *YUC6* had some activity in the cotyledon vasculature.  
505 *YUC4* and *YUC5* showed complementary expression patterns along the cotyledon perimeter.  
506 *YUC4* expression concentrated in the distal end of the cotyledon and *YUC5* was active along the  
507 edge of the cotyledon without overlapping with the *YUC4* domain (Figure 6). These well-defined  
508 expression patterns of *GUS* fusions suggest that local auxin is produced in specific tissues by a  
509 combinatorial action of several tryptophan aminotransferases and flavin-containing  
510 monooxygenases that together contribute to establishing the morphogenic gradients of auxin.

511  
512 Of the pharmacological treatments tested in shoots of three-day-old etiolated seedlings,  
513 addition of ACC in the growth media had the greatest effect on auxin gene activity, inducing 10  
514 of the 14 genes of the IPyA pathway, specifically *TAR2*, *YUC2*, *YUC3*, *YUC4*, *YUC5*, *YUC6*, *YUC7*,  
515 *YUC8*, *YUC10*, and *YUC11* (Figure 6). Remarkably, in the presence of NPA plus ACC, all of these  
516 nine genes showed patterns and levels of expression indistinguishable from that in NPA alone,  
517 indicating that NPA could block the effect of ACC in shoots and implying that ACC may exert its  
518 effect by inducing polar auxin transport, consistent with prior reports (Ruzicka et al., 2007;  
519 Swarup et al., 2007). In contrast, the poorly expressed *YUC11* displayed barely detectable  
520 activity in both ACC and in NPA plus ACC, but not in NPA alone. Of the 13 auxin biosynthesis  
521 genes detectable in shoots (all but *YUC9*), only *YUC1* was not notably responsive to any of the  
522 four pharmacological treatments (Figure 6).

523  
524 We also tested the expression of the 14 auxin biosynthesis genes in inflorescences and flowers  
525 of soil-grown plants (Figure 7). *TAA1* showed predominant expression in young gynoecia,  
526 especially in the developing ovules, and somewhat milder expression in the transmitting tract  
527 and ovules of older gynoecia (red arrows in Figure 7). In young anthers, *TAA1* exhibited a broad  
528 domain of expression, but as the anthers matured, the domain of *TAA1* activity became more  
529 restricted, concentrating at the distal tips of these organs (red arrows in Figure 7). *TAR1* and  
530 *TAR2* were also expressed in the anthers of young flowers, and *TAR2* was additionally  
531 detectable in the gynoecium and in mature flowers' petal and sepal abscission zones (red  
532 arrows in Figure 7). Complementing the expression of *TAR2* in the abscission zones of older  
533 flower organs were multiple *YUC* genes (all but *YUC9* and *YUC11*) (red arrows in Figure 7).

534 *DR5:GUS* and all members of the *YUC* family showed varying degree of activity in the anthers,  
535 with the immature male reproductive organs in *YUC2* and *YUC6* lines displaying the most  
536 prominent GUS activity, predominantly in the flowers of stage 8 to 13 (staging according to  
537 (Smyth et al., 1990; Alvarez-Buylla et al., 2010)). In older flowers, *YUC8* showed localized  
538 expression in the upper region of stamen filaments at the junctions with the anthers (red  
539 arrows in Figure 7). Remarkably, only *YUC4* was active in the gynoecia among all *YUC* family  
540 members (Villarino et al., 2016), specifically in the stigmatic tissue (red arrows in Figure 7).  
541 *DR5:GUS*, on the other hand, exhibited well-defined domains of expression in the ovules and  
542 developing seeds of older gynoecia (red arrows in Figure 7). None of the *YUCs* and *TAA1/TARs*  
543 were prominently expressed in older anthers, petals or sepals (Figure 7). While we cannot  
544 exclude the possibility that some of the auxin biosynthesis genes are mildly active in those  
545 tissues, the expression levels of these enzyme genes fall below our detection limit.

546  
547

## 548 **DISCUSSION**

549

### 550 **Recombineering**

551

552 High-efficiency homologous recombination mediated by the expression of specific phage  
553 proteins in bacteria, the process also known as recombineering, has been proven as an  
554 invaluable tool for high-throughput genome editing in bacteria (Isaacs et al., 2011). Although  
555 recombineering can equal and, in some respects, surpass the popular CRISPR-Cas systems as a  
556 precise genome editing tool in bacteria, to date, this system has not been proven to work  
557 efficiently in eukaryotic cells. Nevertheless, the power of recombineering has been widely used  
558 in eukaryotic model systems such as *C. elegans* (Sarov et al., 2006; Tursun et al., 2009) and  
559 *Drosophila* (Venken et al., 2008; Ejsmont et al., 2009; Sarov et al., 2016) to generate genome-  
560 wide collections of whole-gene translational fusions, thus opening doors to obtaining high-  
561 confidence gene expression landscapes in these organisms. As these whole-gene translational  
562 fusions are likely to capture most, if not all, of the regulatory sequences of a gene, it is not  
563 surprising that whenever systematic comparisons between classical and whole-gene  
564 recombineering-based translational fusions have been carried out, the superiority of the  
565 recombineering results has been clearly established (Sarov et al., 2012). Although no such  
566 systematic analysis has been carried out in plants, our anecdotal experience in *Arabidopsis* also  
567 suggests that recombineering-based whole-gene translational reporters are better at reflecting  
568 the native gene expression patterns. Thus, for example, the expression profiles of classical  
569 translational fusions for the auxin biosynthetic gene *TAA1* that passed the gold-standard quality  
570 control of complementing the mutant phenotype (Yamada et al., 2009) have been shown to be  
571 quite different from the expression domains observed with recombineering-based constructs  
572 (Stepanova et al., 2008). Importantly, we have recently shown that the recombineering-based,  
573 whole-gene, but not the classical translational fusion constructs, were able to complement a  
574 larger array of phenotypes examined under different conditions and in different tissues and  
575 mutant backgrounds (Brumos et al., 2018). Although somewhat anecdotal, the case of *TAA1* is  
576 not the only one reported, as the expression patterns deduced from an *AUX1* recombineering  
577 construct explain better than the classical promoter-fusion constructs the role of this gene in

578 auxin redistribution in the root (Band et al., 2014). Furthermore, herein we show that the  
579 recombineering-construct-derived expression patterns of *TAA1* and several *YUC* genes (*YUC1*,  
580 *YUC2*, *YUC3*, *YUC4*, *YUC5*, and *YUC7*) are different from that previously reported using classical  
581 promoter fusions (Cheng et al., 2006; Yamada et al., 2009; Lee et al., 2012; Chen et al., 2014;  
582 Challa et al., 2016; Kasahara, 2016; Brumos et al., 2018; Xu et al., 2018) (see below). Again,  
583 although no systematic or comprehensive comparison has yet been performed in plants, the  
584 few examples described here in a plant with a relatively small and compact genome such as  
585 *Arabidopsis*, as well as the systematic analysis in *C. elegans*, strongly argue for the use of  
586 caution when inferring native expression patterns from translation-fusion experiments that use  
587 only a few kilobases of genomic DNA flanking the GOI. It is logical to think that the need for the  
588 use of large genomic regions flanking the GOI should be even greater in plants with larger (i.e.,  
589 less compact) genomes. Ideally, direct tagging of the GOI in its chromosomal context should  
590 produce the most reliable expression patterns, but the current technology is not yet efficient  
591 enough to be widely adopted. It is likely that, in the same way that the constant advances in the  
592 CRISPR-Cas system technologies have made the introduction of mutations in a particular gene  
593 almost a routine in many plant research laboratories, the precise editing and  
594 insertion/replacement of sequences may also become habitual in the future. At this point,  
595 however, recombineering is the best alternative as it offers a relatively simple way to  
596 generating translational fusions and other types of gene editing events in the pseudo-  
597 chromosomal context of large bacterial artificial chromosomes. Nonetheless, to take full  
598 advantage of the power of recombineering, experimental-system-specific resources and tools  
599 need to be developed (Venken et al., 2006; Poser et al., 2008; Ejsmont et al., 2009; Tursun et  
600 al., 2009; Venken et al., 2009; Sarov et al., 2016).

601  
602 In the past, we and others have shown that recombineering could be used to make precise  
603 gene modifications in the context of large DNA constructs in plants (Stepanova et al., 2008;  
604 Bitrian et al., 2011; Stepanova et al., 2011; Zhou et al., 2011; Peret et al., 2012a; Peret et al.,  
605 2012b; Pietra et al., 2013; Band et al., 2014; Fabregas et al., 2015; Han et al., 2015; Worden et  
606 al., 2015; Bhosale et al., 2018; Brumos et al., 2018; Yanagisawa et al., 2018; Gomez et al., 2019).  
607 In spite of the obvious advantages of using large fragments of DNA to ensure that most, if not  
608 all, regulatory sequences have been captured, and the relative ease by which different types of  
609 modifications can be introduced in large DNA clones such as BACs or TACs, recombineering has,  
610 at present, not been widely embraced by the plant community. Although there are probably  
611 several reasons for this, the extra labor and time required to generate recombineering  
612 constructs, the limited access to sequenced TAC libraries, the difficulty of working with large  
613 DNA constructs, etc. are among the likely factors.

614  
615 To eliminate some of these potential obstacles for adopting recombineering and, thus, make  
616 this technology more accessible, we have developed and made freely available a new set of  
617 tools and resources. A collection of recombineering cassettes that contain both a commonly  
618 used tag (such as *GFP*, *GUS* etc.) and an antibiotic resistance marker have been generated  
619 (Table S5). In these cassettes, the sequences of the antibiotic resistance gene can be precisely  
620 removed with ~100% efficiency using the *FRT* sites flanking the sequence by inducing a *FLP*  
621 recombinase integrated in the recombineering SW105 strain of *E. coli*. Using this new set of

622 recombineering cassettes not only makes the procedure much faster and cheaper, but also  
623 extremely efficient and simple, all while avoiding the use of complicated and expensive  
624 bacterial minimal growth media. Limited access to transformation-ready bacterial artificial  
625 chromosomes containing the GOI could have also limited the adoption of this technology. To  
626 eliminate this potential problem, we have deposited in the ABRC a copy of the JAtY library  
627 developed at the John Innes Centre by Dr. Ian Bancroft's group. This, together with the recent  
628 publication of the sequence information for several thousand clones of the Kazusa TAC  
629 collection (Hirose et al., 2015), also available via the ABRC and RIKEN, and our Genome Browser  
630 tool (<https://brcwebportal.cos.ncsu.edu/plant-riboprints/ArabidopsisJBrowser/>) and out  
631 MATLAB application (<https://github.com/Alonso-Stepanova-Lab/Recombineering-App>) to  
632 identify the best TAC clone and set of primers to tag any given gene, should significantly  
633 improve the accessibility and use of recombineering in plants.

634  
635 To extend the use of recombineering beyond *Arabidopsis*, we have also developed another set  
636 of recombineering cassettes and binary vectors for the efficient transfer of large fragments of  
637 DNA from a BAC to high-capacity transformation-ready vectors, such as derivatives of  
638 pYLTA17. This opens the possibility of using recombineering in any transformable plant  
639 species for which a BAC library covering the whole genome has been at least end-sequenced.  
640 Previous work from the Dr. Csaba Koncz group has implemented the use of gap-repair cloning  
641 to transfer DNA from a BAC to binary vectors (Bitrian et al., 2011). Although this is a clever and  
642 relatively simple approach, it requires the cloning of different genomic DNA fragments in a  
643 binary vector for each GOI, limiting its convenience and scalability. Our cassette-exchange  
644 approach expands the ability to employ recombineering not only to other plant species, but  
645 also allows for scalability and the use in plant transformation of very large DNA fragments (over  
646 75 kb) originally present in a BAC clone.

647  
648 Finally, our antibiotic-based positive/negative selection cassettes (such as the *Universal tag-*  
649 *generator* cassette) provide a simple way to convert any existing tag into a recombineering-  
650 ready cassette. Thus, although our toolset comes with a collection of reporter tags ready to be  
651 used in gene expression analysis experiments, other types of specialized tags (such as those for  
652 the study of protein-protein interactions, protein-DNA, protein-RNA complexes, etc.) can be  
653 easily converted into recombineering cassettes using our tag-generator tool. This same tag-  
654 generator tool can also be utilized to make more sophisticated gene edits in the context of a  
655 BAC clone. In these types of experiments, the *tag generator* cassette is first inserted in the  
656 location near the point where the change needs to be introduced using the positive selection  
657 for ampicillin. The whole cassette can then be replaced by the sequence of choice by selecting  
658 against *RPSL* in the presence of streptomycin. The only limitation of the type of modification  
659 that can be made using this approach is the size of the DNA fragment used to replace the  
660 *Universal tag-generator* cassette due the inverse relationship between the size of a linear DNA  
661 fragment and its electroporation efficiency into *E. coli*. However, most applications only require  
662 the use of up to a few thousand base pairs as replacement DNA, and fragments of such sizes  
663 can be efficiently transformed into the recombineering *E. coli* strains. Thus, although the tag  
664 generator cassette is functionally equivalent to the classic *galk* cassette, it has the clear  
665 advantage of requiring simple LB medium and highly efficient antibiotic resistance instead of

666 complicated and expensive minimum media and 2-deoxy galactose metabolic selection  
667 required for the use of the *galk*-based systems. In summary, the toolset and resources  
668 described in this work should make it possible for any molecular biology research laboratory,  
669 and even teaching laboratories equipped for basic bacterial growth and PCR amplification, to  
670 carry out large arrays of gene editing experiments by recombineering.

671  
672 To further demonstrate the utility of the developed tools and resources, we implemented an  
673 experimental pipeline for tagging by recombineering 96 genes in parallel. Although high-  
674 throughput protocols have been previously developed for the generation of genome-wide  
675 translational fusions in *Drosophila* and *C. elegans*, we have opted for an intermediate  
676 throughput where individual clones after each transformation or recombination event are  
677 tested. We believe that the approach described here is better when a relatively small number  
678 of genes are being tagged, as it ensures that final constructs will be obtained for most, if not all,  
679 of the genes of interest. The testing steps in solid media, however, could be easily eliminated as  
680 has been done previously by others (Sarov et al., 2012; Sarov et al., 2016) to further increase  
681 the throughput of the procedure, although at the likely cost of a decrease in the percentage of  
682 genes finally tagged.

### 683 684 **Auxin biosynthesis**

685  
686 Auxin gradients play key roles in plant growth and development. In the past, the morphogenic  
687 auxin gradients have been mainly explained by a combined action of auxin transport and  
688 signaling/response (reviewed in (Vanneste and Friml, 2009)). Only in the last few years the  
689 contribution of local auxin production has been associated with the generation and  
690 maintenance of the morphogenic auxin maxima (Stepanova et al., 2008; Brumos et al., 2018;  
691 Zhao, 2018). Our present work characterizing the expression patterns of all the genes involved  
692 in IAA production through the indole-3-pyruvic acid (IPyA) pathway, the main route of auxin  
693 biosynthesis in *Arabidopsis* (Mashiguchi et al., 2011; Stepanova et al., 2011), sheds fresh light  
694 on the spatiotemporal patterns of auxin production by precisely defining the domains of  
695 activity of every *TAA1/TAR* and *YUC* gene in a limited set of tissues and developmental stages.

696  
697 The establishment and maintenance of the shoot (SAM) and root apical meristems (RAM) is  
698 governed by auxin gradients generated by a joint action of local auxin biosynthesis and  
699 transport (Brumos et al., 2018; Wang and Jiao, 2018). Our observations indicate that in the  
700 SAM, auxin is locally synthesized by the tryptophan aminotransferases *TAA1* and *TAR2* and  
701 flavin monooxygenases *YUC1* and *YUC4*. In roots, *TAA1*, *YUC3*, *YUC7*, *YUC8* and *YUC9* are  
702 responsible for the production of IAA in the stem cell niche of the RAM. These observations are  
703 in agreement with recent single-cell RNA sequencing assays profiling the developmental  
704 landscape of *Arabidopsis* root (Zhang et al., 2019), where *YUC3*, *YUC8* and *YUC9* are included in  
705 the stem cell niche clusters.

706  
707 In roots, ethylene triggers local auxin biosynthesis leading to an increase in auxin levels and the  
708 inhibition of root elongation (Stepanova et al., 2005; Ruzicka et al., 2007; Stepanova et al.,  
709 2007; Swarup et al., 2007; Stepanova et al., 2008; Brumos et al., 2018). Higher-order mutants of

710 the *TAA1/TAR* and *YUC* gene families (Stepanova et al., 2008; Mashiguchi et al., 2011) display  
711 root-specific ethylene insensitive phenotypes. However, the specific genes involved in the local  
712 production responsible for the boost in auxin levels, particularly in the root elongation zone,  
713 have not been yet identified. Herein, we discovered that multiple genes of the IPyA pathway  
714 (*TAA1*, *TAR1*, *TAR2*, *YUC3*, *YUC5*, *YUC8*, and *YUC11*) are induced in roots by the treatment with  
715 the ethylene precursor ACC, with *TAA1*, *YUC3* and *YUC5* displaying a clear upregulation in the  
716 elongation zone. This observation suggests that auxin locally produced by these genes in the  
717 elongation zone may contribute to the arrest of root growth in the presence of ethylene. In  
718 addition, other ethylene-inducible *TARs* and *YUCs* may also contribute to the ethylene-triggered  
719 auxin-mediated root growth inhibition, as auxin transport also plays an important role in the  
720 ethylene responses in roots via transcriptional induction of *AUX1*, *PIN1*, *PIN2*, and *PIN4* by  
721 ethylene (Ruzicka et al., 2007).

722  
723 Our survey of auxin gene expression patterns in the recombineering fusions has unexpectedly  
724 uncovered the ACC-triggered induction of multiple auxin biosynthesis genes in the shoots of  
725 etiolated seedlings. As many as 10 of the 14 genes investigated, *TAR2*, *YUC2*, *YUC3*, *YUC4*, *YUC5*,  
726 *YUC6*, *YUC7*, *YUC8*, *YUC10*, and *YUC11*, are upregulated by ethylene in the hypocotyls and/or  
727 cotyledons, suggesting that a boost in auxin levels may contribute to the ethylene-induced  
728 shortening of hypocotyls and/or inhibition of cotyledon expansion (Vaseva et al., 2018). To  
729 date, the effect of ethylene on auxin biosynthesis has been extensively investigated only in  
730 roots (Stepanova et al., 2005; Ruzicka et al., 2007; Stepanova et al., 2007; Swarup et al., 2007;  
731 Stepanova et al., 2008; Brumos et al., 2018). Having the new recombineering reporter lines  
732 available for all major auxin biosynthetic pathway genes opens doors not only to the study of  
733 auxin production in seedlings, but also to the dissection of spatiotemporal patterns of local  
734 auxin biosynthesis in all organs and tissues under a myriad of different conditions, genotypes,  
735 and treatments. In fact, an inquiry into the spatial distribution of the expression of auxin  
736 biosynthetic genes in reproductive organs uncovered anthers, gynoecia, and developing ovules  
737 and seeds as the major sites of auxin biosynthesis. What is, perhaps, unexpected is that in the  
738 flowers, the vast majority of *YUC* gene activity (and, consequently, the expression of the auxin  
739 responsive reporter *DR5:GUS*) is concentrated almost exclusively in the male reproductive  
740 organs (in the anthers), whereas *TAA1* is predominantly active in the female organs (in the  
741 gynoecia). These observations suggest that some of the product of the *TAA1/TAR*-catalyzed  
742 biochemical reaction, IPyA, that serves as a substrate for *YUCs* to make auxin, IAA, may be  
743 transported within the flowers out of the gynoecia, e.g. to the anthers. With IPyA being a  
744 highly labile compound, at least *in vitro* (Tam and Normanly, 1998), determining if and how it  
745 moves within the plant may be challenging. Alternatively, *YUC* expression in the gynoecia may  
746 simply be below out detection limit, or the conversion of IPyA to IAA may not be the rate-  
747 limiting “bottleneck” step in every tissue that makes auxin. Nonetheless, some IPyA is likely  
748 made directly in young anthers, as *TAA1*, *TAR1* and *TAR2* all show some activity in those organs.  
749 The local anther-made IPyA, together with the pool of IPyA potentially transported from the  
750 gynoecia, can then be utilized by multiple anther-expressed *YUCs* to make auxin that  
751 contributes to pollen maturation, pre-anthesis filament elongation and anther dehiscence  
752 (Cecchetti et al., 2008). Our prior work (Brumos et al., 2018) indicates that the spatiotemporal  
753 misregulation of *TAA1* expression in developing flowers, that is expected to shift the domains



754 of local IPyA and, hence, auxin production, results in flower infertility, highlighting the  
755 importance of the specific patterns of auxin gene activity for proper flower development. With  
756 the new recombineering resources at hand, we can now start dissecting the roles of individual  
757 *TAA1/TAR* and *YUC* family members in the development of flowers and other organs and  
758 tissues in *Arabidopsis*.

759  
760 Several of the new translational reporters generated in this study by recombineering,  
761 specifically those for *TAA1*, *YUC1*, *YUC2*, *YUC3*, *YUC4*, *YUC5* and *YUC7*, behave differently from  
762 the previously published transcriptional reporters for the same genes (Cheng et al., 2006;  
763 Yamada et al., 2009; Lee et al., 2012; Chen et al., 2014; Challa et al., 2016; Kasahara, 2016;  
764 Brumos et al., 2018; Xu et al., 2018). For example, in primary roots, *TAA1* transcriptional fusions  
765 are mainly expressed in the stele (Yamada et al., 2009; Brumos et al., 2018), whereas the  
766 recombineering construct is active in the quiescent center (QC) and pro-vasculature (this work  
767 and (Stepanova et al., 2008; Brumos et al., 2018)). *YUC3* promoter fusion is the strongest in the  
768 elongation zone of the primary root (Chen et al., 2014), but the recombineering construct is  
769 predominantly detected in the QC, as well as in the columella initials and the root cap (this  
770 work). For *YUC5*, prominent QC expression is seen for transcriptional fusions (Challa et al.,  
771 2016), but not for translational fusions generated by recombineering (this work), yet both  
772 constructs are active along the edges of the cotyledons. For *YUC7*, a transcriptional fusion is  
773 mildly active in the proximal regions of the root but is not detectable in the root meristem (Lee  
774 et al., 2012), whereas the recombineering construct for this gene is highly active in the QC and  
775 the root cap (this work). Analogous discrepancies are seen in the reproductive organs. For  
776 example, in mature flowers, *YUC1* is detectable in the flower abscission zones only with a  
777 recombineering translational fusion (this work), but not with a transcriptional reporter (Cheng  
778 et al., 2006). *YUC2* promoter fusion shows expression in young flowers, specifically in the valves  
779 of gynoecia, the pedicels, flower organ abscission zones, and petals, and no detectable  
780 expression in mature flowers (Cheng et al., 2006), whereas a recombineering translational  
781 fusion construct for this gene is active in the anthers of young flowers and in the abscission  
782 zones of petals and sepals in mature flowers (this work). For *YUC4*, both transcriptional and  
783 translational fusions are expressed in the female reproductive structures, specifically in the  
784 stigmas, but in the male reproductive structures, the transcriptional reporters are active only in  
785 the distal tips of the anthers (Cheng et al., 2006), whereas the recombineering-generated  
786 translational fusions have more ubiquitous, uniform activity throughout the entire anthers (this  
787 work). In addition, transcriptional reporters for *YUC4* are detected in young flower buds at the  
788 base of floral organs (Cheng et al., 2006), but this domain of activity is not readily observed in  
789 the recombineering-generated translational reporter fusions (this work).

790  
791 The differences in the expression patterns and levels of the transcriptional and translational  
792 reporters are likely due to the lack of some key regulatory elements in the promoter-only  
793 fusions that are captured in the recombineering reporters made in this work, as the latter  
794 constructs include much larger upstream (10kb) and downstream (5kb) regions of the genes  
795 and possess the full coding regions with all of the introns. In the recombineering constructs, the  
796 presence of introns can provide a diverse population of mRNAs due to alternative splicing, as  
797 may be the case for *YUC4* (Kriechbaumer et al., 2012). Differences in the length, content and

798 structure of the transcripts can lead to differences in RNA stability and localization, resulting in  
799 variable expression levels and patterns (Kriechbaumer et al., 2012). It is, however, not  
800 uncommon to see discrepancies in the expression patterns of transcriptional versus  
801 translational fusions even for the constructs that harbor identical promoter fragments. For  
802 example, the activities of *YUC1* and *YUC4* reporters made by classical cloning approaches (Xu et  
803 al., 2018) differ for the transcriptional versus translational constructs, with translational  
804 reporters showing less activity specifically in young flowers than their respective transcriptional  
805 fusions. The differences in expression can be explained by the presence of negative  
806 transcriptional regulatory elements in the introns of these genes harbored in the translational  
807 fusions, as well as by the mobility and/or instability of fusion RNAs or proteins. For example,  
808 protein turnover plays a major role in the expression of auxin co-receptor proteins Aux/IAAs,  
809 with translational fusions, unlike transcriptional reporters, for these genes being hard to detect  
810 due to rapid Aux/IAA protein degradation in the presence of auxin (Tiwari et al., 2001; Zhou et  
811 al., 2011). Regardless of the molecular underpinnings of the expression pattern differences  
812 between previously published classical and newly generated recombineering reporters, the  
813 latter constructs harbor most if not all of the regulatory elements of the native gene and thus  
814 should be considered the gold standard in gene functional studies.

815

## 816 **METHODS**

817

### 818 **General recombineering procedures**

819

820 Recombineering experiments were carried out as described in (Alonso and Stepanova, 2015). In  
821 brief, SW105 cells carrying the TAC or BAC of interest were grown overnight at 32°C in LB  
822 supplemented with the antibiotic needed to select for the corresponding BAC or TAC. Overnight  
823 culture (1 mL) was used to inoculate 50 mL of LB plus antibiotic in a 250 mL flask and grown at  
824 32°C for 2-3 h with constant shaking. The lambda-red recombineering system was activated by  
825 incubating the cells in a water bath at 42°C and constant shaking for 15 min. Cells were  
826 immediately cooled down in water-ice bath and electrocompetent cells were then prepared  
827 (Alonso and Stepanova, 2015). Cells were electroporated with the PCR-amplified  
828 recombineering cassette and allowed to recover in LB for 1 h at 32°C, and then plated in an LB  
829 plate with the corresponding selection. After a two-day incubation at 32°C, the presence of the  
830 recombination event in the primary transformants was confirmed by colony PCR using a gene-  
831 specific primer and a primer specific for the inserted cassette. Primer sequences are provided in  
832 Tables S1-S4. FLP reaction was carried out by growing the SW105 cells harboring the TAC or  
833 BAC clone with the desired recombineering cassette already inserted in the location of interest  
834 overnight at 32°C under constant shaking in LB media supplemented with the necessary  
835 antibiotics to select for the BAC or TAC. Fresh LB media (1 mL) with the antibiotic necessary to  
836 select for the BAC or TAC backbone was inoculated with 50 µL of overnight culture and 10 µL of  
837 10% (w/v) L-arabinose. The cells were then grown for 3 hours at 32°C with constant shaking. A  
838 sterile toothpick was dipped in the culture and used to streak a few cells into a fresh LB plate  
839 supplemented with the antibiotic necessary to select for the BAC or TAC backbone with the  
840 goal of obtaining isolated colonies. Colonies were then tested by colony PCR to confirm the

841 elimination of the *FRT*-flanked DNA sequences. To ensure that the modification in the GOI is  
842 correct, the test PCR product was sequenced using the corresponding test oligos.

843  
844 Commercial DNA synthesis services (IDT) were used to obtain the following sequences:  
845 *Universal GUS-FRT-Amp-RFP*, *Universal RPSL-Amp* and *Universal tag-generator* cassettes, as  
846 well as the *Universal AraYpet*, and the *Universal 3xAraYpet* fluorescent protein genes.  
847 Sequences of these cassettes are provided in Supplemental Table S5.

#### 848 849 **High-throughput recombineering and trimming of the 3xYPET and GUS cassettes**

850  
851 The basic recombineering procedures were followed during the parallel processing of 96  
852 constructs with the following modifications. The 96 DH10B strains carrying the genes of interest  
853 were inoculated in 96 1-mL LB kanamycin cultures in a 96-deep-well plate and grown overnight.  
854 TAC DNA was extracted by regular alkaline lysis (Alonso and Stepanova, 2014) using 12 strips of  
855 eight 1-mL tubes. In parallel, freshly prepared SW105 electrocompetent cells (Alonso and  
856 Stepanova, 2015) were aliquoted into the 96 electroporation wells of a 96-well electroporation  
857 plate (BTX electroporation Systems). 40  $\mu$ L of competent cells and 3  $\mu$ L of DNA were mixed in  
858 the cuvette and electroporated as previously described (Alonso and Stepanova, 2015). Cells  
859 were transferred to a 96-deep-well plate and incubated at 32°C with shaking for 1-2 hours to  
860 recover. Cells were collected by centrifugation and plated on LB kanamycin plates. After  
861 confirming by PCR the presence of the TAC clones using the testing primers (see Tables S1-S4),  
862 glycerol stocks for the 96 SW105 strains were generated. Using these stocks, 96 cultures were  
863 grown overnight in a 96-deep-well plate. Eight sets of 12 strains were pooled together to  
864 inoculate eight 250-mL flasks with LB kanamycin, grown for additional 3 hours, heat shocked at  
865 42°C, and then used to prepare electrocompetent cells as previously described (Alonso and  
866 Stepanova, 2015). In parallel, 96 amplicons corresponding to the desired recombineering  
867 cassette (*Universal Venus-FRT-galk-FRT*, *Universal AraYpet-FRT-Amp-FRT* or *Universal*  
868 *3xAraYpet-FRT-Amp-FRT*) were obtained using DNA template for the cassette and the  
869 corresponding recombineering primers (Tables S1 to S4). PCR fragments were purified by  
870 chloroform extraction and ethanol precipitation. PCR DNA was resuspended in 20  $\mu$ L of water  
871 and 3  $\mu$ L were used for electroporation in the 96-well electroporation cuvette as described  
872 above. Recovery, plating, and testing was also done as described above except that LB  
873 kanamycin and ampicillin plates were used for the selection. Test PCR products were  
874 sequenced to confirm the integrity and fidelity of the recombination events. For the trimming,  
875 the *Tet<sup>R</sup>* gene was amplified from the *FRT2-Tet-FRT2* trimming cassette to generate 96 trimming  
876 amplicons using the primers replaLB-tet Universal and one of the 96 Gene-DelRight primers  
877 (Table S4). The 96-well format recombination procedure was done as described above but  
878 selecting the recombination events in LB plate supplemented with kanamycin and tetracycline.  
879 The insertions were confirmed using the LBtest and the corresponding TestDelRigh primer  
880 (Table S4). A second round of trimming was carried out using 96 amplicons obtained by  
881 amplifying the *Amp<sup>R</sup>* gene from the *FRT5-Amp-FRT5* trimming cassette with the primers  
882 replaRB-amp Universal and one of the 96 Gene-DelLeft recombineering primers. After  
883 confirming the trimming by PCR using the primers testRB and the corresponding TestDelLeft  
884 oligo, the second antibiotic resistance gene, *aadA*, an *aminoglycoside 3'-adenylyltransferase*

885 gene that confers spectinomycin and streptomycin resistance in both in *E. coli* and  
886 *Agrobacterium*, was introduced in the trimmed constructs by recombineering using an  
887 amplicon obtained by amplifying the *Kan-Spec cassette* using the primers Spect-Kan test F and  
888 Spect-Kan test R (Table S4). Plasmid DNAs for the 96 strains obtained were prepared by  
889 alkaline lysis using 12 strips of eight 1-mL tubes and electroporated into electrocompetent  
890 *Agrobacterium* using the same 96-well procedure as described above. *Agrobacterium* selection  
891 was done using LB pates supplemented with kanamycin and spectinomycin.

892

#### 893 **Generation of the *Universal Venus-FRT-galk-FRT cassette***

894

895 The *Universal AraYpet* was utilized as a template with the primers PEO1F and PEO1R. This  
896 amplicon was inserted in the JAtY clone JAtY68N23 using the classical *galk* system as described  
897 (Zhou et al., 2011) to generate the *Universal AraYpet cassette*. The *Venus-FRT-galk-FRT*  
898 sequences from the pBalu6 were amplified using the primers VenusPeo1F and VenusPeo1R and  
899 this PCR product was employed to replace the *Ypet* sequences in the *Universal AraYpet cassette*  
900 by recombineering, as described (Zhou et al., 2011).

901

#### 902 **Generation of the *Universal mCherry-FRT-galk-FRT cassette***

903

904 A strategy similar to that used to generate the *Universal Venus-FRT-Galk-FRT* was utilized to  
905 produce the *Universal mCherry-FRT-galk-FRT cassette*, but in this case the primers CherryPeo1F  
906 and VenusPeo1R were employed to amplify the *mCherry FRT-galk-FRT* sequences from pBalu8.  
907 This PCR product then served to replace the *Ypet* sequences in the *Universal AraYpet cassette*  
908 by recombineering as described (Zhou et al., 2011).

909

#### 910 **Generation of the *Universal AraYpet-FRT-Amp-FRT cassette***

911

912 The ampicillin resistance gene, *Amp<sup>R</sup>*, and the corresponding promoter were amplified from  
913 pBluescript with the primers PEO1FRTAmpF and PEO1FRTAmpR. This PCR product was then  
914 used in a recombineering reaction to insert the *FRT-Amp-FRT* sequences in the *Universal*  
915 *AraYpet cassette* to generate the *Universal AraYpet-FRT-Amp-FRT cassette*.

916

#### 917 **Generation of the *Universal AraYpet-FRT-TetA-FRT cassette***

918

919 The tetracycline resistance gene, *Tet<sup>R</sup>*, and the corresponding promoter sequences were  
920 amplified from the genomic DNA of the recombineering strain of *E. coli* SW102 with the primers  
921 PEO1FRTtetAF and PEO1FRTtetRAR. This PCR product was then employed in a recombineering  
922 reaction to insert the *FRT-Tet-FRT* sequences in the *Universal AraYpet cassette* to generate the  
923 *Universal AraYpet-FRT-TetA-FRT cassette*.

924

#### 925 **Generation of the *Universal 3xAraYpet-FRT-Amp-FRT cassette***

926

927 The *Universal 3xAraYpet* sequence was commercially synthesized by IDT and utilized as a  
928 template for a PCR reaction with the primers IAA5F and IAA5R. The obtained amplicon was

929 inserted in the JAtY61G08 clone using the classical *galK* recombineering approach as described  
930 (Zhou et al., 2011) to generate the *Universal 3xAraYpet* cassette. The *FRT-Amp-FRT* sequences  
931 from the *Universal AraYpet-FRT-Amp-FRT* cassette were amplified with the primers 3YpetFAFF1  
932 and 3YpetFAFR1 and inserted in the *Universal 3xAraYpet* cassette to create the *Universal*  
933 *3xAraYpet-FRT-Amp-FRT* cassette.

934

#### 935 **Generation of the *Universal-RFP-FRT-Amp-FRT* cassette**

936

937 The *Universal tag-generator* cassette was commercially synthesized by IDT and then amplified  
938 with the primers PCL5\_STOP\_5UA and 3UA\_PCL3. The resulting amplicon was inserted in the  
939 tomato BAC clone HBa0079M15 by recombineering (Zhou et al., 2011). The *RFP* DNA was  
940 amplified from the pUBC-RFP-DEST vector (Grefen et al., 2010) with the primers  
941 PCL5\_5UA\_RFP-f and UR\_RFP-r. The resulting product was used in a recombineering reaction to  
942 replace the *RPSL* in the BAC clone containing the *Universal tag-generator* cassette.

943

#### 944 **Generation of the pDONR221-FRT2-SacB-FRT5 and pGWB1-FRT2-SacB-FRT5 vectors**

945

946 The *SacB* gene was amplified from the BiBAC2 vector (Hamilton, 1997) with the primers  
947 FRT2SLongNew and FRT5Long. The PCR product was then cloned in the pDONR221 to create  
948 the pDONR221-FRT2-SacB-FRT5 vector. Spacer sequences for the orthogonal *FRTs* were  
949 obtained from a published source (Schlake and Bode, 1994). The pGWB1-FRT2-SacB-FRT5  
950 vector was generated by transferring the *FRT2-SacB-FRT5* sequences from the pDONR221-  
951 FRT2-SacB-FRT5 to the pGWB1 binary vector using a Gateway LR reaction.

952

#### 953 **Generation of the *Kan-Spec* cassette**

954

955 The *aadA* sequences were amplified from the pTF101 vector with the primers SpectFKan and  
956 SpectRkan and inserted in the JAtY63D14 clone to generate the *Kan-Spec* cassette template.  
957 Primers Spect-Kan test F and Spect-Kan test R can be used to amplify the *Kan-Spec* cassette  
958 from the *Kan-Spec* cassette template.

959

#### 960 **Generation of the pYLTA17-FRT2-SacB-FRT5-Spec vector**

961

962 The *RPSL-Amp* sequences were amplified from the *Universal RPSL-Amp* cassette with the  
963 primers replaRBampRPSL and replaLBTetRPSL. The resulting PCR product was used to replace  
964 all of the *Arabidopsis* genomic and the *SacB* sequences in the JAtY56F21 clone by  
965 recombineering (Zhou et al., 2011) producing the pYLTA17-RPSL-Amp vector. Next, the *FRT2-*  
966 *SacB-FRT2* cassette was amplified from the pDONR221-FRT2-SacB-FRT5 vector with the primers  
967 replaRBSacBM13F and replaLBSacBM13R and utilized in a recombineering reaction to replace  
968 the *RPSL-Amp* sequence in the pYLTA17-RPSL-Amp to generate the pYLTA17-FRT2-SacB-FRT5  
969 vector. Next, the bacterial *aadA* (*aminoglycoside-3'-adenyltransferase*) gene to confer  
970 spectinomycin and streptomycin resistance was amplified from *Spec-Kan* cassette by PCR with  
971 primers Spec-Kan test F and Spec-Kan test R and integrated into the pYLTA17-FRT2-SacB-FRT5  
972 vector by recombineering to generate the final pYLTA17-FRT2-SacB-FRT5-Spec vector.

973

#### 974 **Generation of the pYLAC17-FRT2-SacB-FRT5-Spec-Kan vector**

975

976 The *RPSL-Amp* sequences were amplified from the *Universal RPSL-Amp* cassette with the  
977 primers pYLAC-RPSL-Amp-f2 and pYLAC-RPSL-Amp-r2. The resulting PCR product was used to  
978 replace the Act1 5'-Bar-Nos 3' cassette in pYLAC17-FRT2-SacB-FRT5 to generate the pYLAC17-  
979 FRT2-SacB-FRT5-RPSL-Amp. Next, the *Kan* resistance cassette for plant selection was amplified  
980 from pGWB1 by PCR with primers pYLAC-Kan-f2 and pYLAC-Kan-r2, and the resulting PCR  
981 product was utilized to replace the *RPSL-Amp* sequence in pYLAC17-FRT2-SacB-FRT5-RPSL-  
982 Amp to generate pYLAC17-FRT2-SacB-FRT5-Kan. Finally, the bacterial *aadA* gene to confer  
983 spectinomycin and streptomycin resistance was amplified from the *Spec-Kan* cassette by PCR  
984 with primers Spec-Kan-testF and Spec-Kan-testR and integrated into the pYLAC17-FRT2-SacB-  
985 FRT5-Kan vector by recombineering to generate the final pYLAC17-FRT2-SacB-FRT5-Spec-Kan  
986 vector.

987

#### 988 **Generation of the *FRT2-Tet-FRT2* trimming cassette**

989

990 The *tetA* resistance gene was amplified from the *Universal AraYpet-FRT-TetA-FRT* cassette with  
991 the primers FRT2-Tet-F (JAtY Universal) and FRT2-Tet-R (EIN3del) and inserted in the TAC clone  
992 JAtY63D14 by recombineering.

993

#### 994 **Generation of the *FRT5-Amp-FRT5* trimming cassette**

995

996 The ampicillin resistance gene, *Amp<sup>R</sup>*, was amplified with the primers FRT5-Amp-R  
997 (BeloBAC11Right universal) and FRT5-Amp-PIN5delR. The resulting PCR product was used as a  
998 template in a second PCR reaction with the primers FRT5-Amp-EIN3delR and FRT5-Amp-R (JAtY  
999 universal) and the resulting PCR product was employed in a recombineering reaction resulting  
1000 in the insertion of the *FRT5-Amp-FRT5* cassette in the TAC clone JAtY63D14.

1001

#### 1002 **Generation of the *Universal galk-FRT-Amp-FRT* cassette**

1003

1004 The *galk* sequence was amplified from the *Universal Venus-FRT-galk-FRT* cassette with the  
1005 primers Unigalk F and UniGalk R. The resulting PCR product was utilized in a recombineering  
1006 reaction to replace the *AraYpet* sequences from the *Universal AraYpet-FRT-Amp-FRT* cassette  
1007 resulting in the *Universal galk-FRT-Amp-FRT* cassette.

1008

#### 1009 **Generation of the *Universal GFP-FRT-Amp-FRT*, *Universal mCherry-FRT-AmpFRT*, and** 1010 ***Universal 3xMYC-FRT-Amp-FRT* cassettes**

1011

1012 The sequences of the *GFP*, *mCherry* and *3xMYC* were amplified with the primer pairs UniGFP  
1013 F/UniGFP R, mCherryAmpF/mCherryAmpR and Uni3XMYC F/Uni3XMYC R, respectively. Each of  
1014 the PCR products was used in an independent recombineering experiment to replace the *galk*  
1015 sequence of the *Universal Galk-FRT-Amp-FRT* cassette by the sequences of each of these new  
1016 tags.

1017

## 1018 **Generation of the *Universal AraYpet-3xMYC-FRT-Amp-FRT***

1019

1020 The *3xMYC-FRT-Amp-FRT* sequence was amplified from the *Universal 3xMYC-FRT-Amp-FRT*  
1021 cassette with the primers *Ypet-3xMYC* and *Uni3xMYC R*. The corresponding PCR product was  
1022 inserted immediately after the *Ypet* sequence to generate the *Universal AraYpet-3xMYC-FRT-*  
1023 *Amp-FRT* cassette.

1024

## 1025 **Examination of the *in vivo* efficiency of an exchange cassette reaction**

1026

1027 To evaluate the efficiency of transferring large DNA fragments from a BAC clone to two  
1028 different binary vectors, pGWB1-FRT5-SaB-FRT5 and pYLAC17-FRT2-SacB-FRT5-Spec, the *YUC9*  
1029 gene (*At1g04180*) was tagged with *GUS* in the C-terminus by a recombineering reaction in  
1030 which the *Universal AraGus-FRT-Amp-FRT* cassette was amplified with the primers *InsertGUS-*  
1031 *Amp-f* and *InsertGUS-Amp-r*. To generate DNA sequences (that contain *YUC9-GUS*) of different  
1032 sizes flanked by the *FRT2* and *FRT5* sites, the *FRT2-Tet-FRT2 trimming* and *FRT5-Amp-FRT5*  
1033 *trimming* cassettes were inserted 10, 25, or 57 kb upstream and 5, 11 and 20 kb downstream of  
1034 the *YUC9* gene, respectively, by recombineering, where the *FRT2-Tet-FRT2 trimming* cassette  
1035 was amplified with the primer pairs *Up-10kb\_FRT2\_f/ Up-10kb\_FRT2\_r*, *Up-25kb\_FRT2\_f/ Up-*  
1036 *25kb\_FRT2\_r* and *Up-57kb\_FRT2\_f/ Up-57kb\_FRT2\_r*, and the *FRT5-Amp-FRT5 trimming*  
1037 cassette was amplified with the primer pairs *Down-5kb\_FRT5\_f/ Down-5kb\_FRT5\_r*, *Down-*  
1038 *11kb\_FRT5\_f/ Down-11kb\_FRT5\_r* and *Down-20kb\_FRT5\_f/ Down-20kb\_FRT5\_r*. After inserting  
1039 the corresponding PCR fragments in the BAC clone and removing the antibiotic resistance genes  
1040 in a FLP reaction, three clones containing the *YUC9* gene tagged with *GUS* in the C-terminus and  
1041 flanked by 10kb upstream and 5 kb downstream, 25 kb upstream and 11 kb downstream, or 57  
1042 kb upstream and 20 kb downstream with the *FRT2* and *FRT5* sites, respectively, were  
1043 generated. The *in vivo* cassette exchange reaction was carried out by electroporating *E. coli*  
1044 SW105 competent cells carrying one of the three *YUC9-GUS* constructs described above and  
1045 grown in the presence of 0.1% (w/v) L-arabinose for the three hours prior to starting the  
1046 process of preparing the cultures for electroporation. After the electroporation with either the  
1047 pGWB1-FRT5-SaB-FRT5 and pYLAC17-FRT2-SacB-FRT5-Spec vectors, the cells were allowed to  
1048 recover for additional 3 hours at 32°C in LB media supplemented with 0.1% (w/v) L-arabinose.  
1049 Clones containing the binary vectors carrying the *YUC9-GUS* genomic sequences delimited by  
1050 the *FRT2* and *FRT5* sites were selected in LB plates supplemented with 10% (w/v) sucrose (to  
1051 select against the unmodified binary vectors) and either kanamycin (50 mg/mL) and hygromycin  
1052 (200mg/mL) to select for the pGWB1-based plasmids or kanamycin (50 mg/mL) and  
1053 spectinomycin (50 mg/mL) to select for the pYLAC17-derived vectors, respectively.

1054

## 1055 **Plant transformation and fluorescence analysis**

1056

1057 Transformation of the *Agrobacterium tumefaciens* strain UIA143 pMP90 (Hamilton, 1997;  
1058 Hamilton, 1997) with the tagged constructs of interest was performed by electroporation as  
1059 described (Alonso and Stepanova, 2015). The resulting colonies were re-streaked on LB plates  
1060 supplemented with the appropriate antibiotic and single colonies were tested by PCR with

1061 gene-specific primers to confirm presence of the construct. Fresh colonies were inoculated into  
1062 5 mL of liquid LB plus kanamycin, grown with shaking overnight at 28°C, and the resulting  
1063 saturated cultures were split into two and plated onto two 150mm LB kanamycin plate. After  
1064 two nights at 30°C, the cells were scraped off with a spatula and resuspended in 100 mL of  
1065 liquid transformation solution (1xMS (pH6.0) 1% (w/v) glucose spiked with 200 µL/L Silvett-77).  
1066 Wild-type *Arabidopsis* (Col-0) grown in soil under 16 h light/ 8 h dark cycle until inflorescences  
1067 are about 15 cm long were transformed with the resulting cultures using flower dip method  
1068 (Clough and Bent, 1998). Plants were allowed to recover under a plastic dome for 24-48 h, and  
1069 then grown to maturity. T1 plants were selected in 20 µg/mL phosphinothricin in AT plates  
1070 (1xMS, 1% (w/v) sucrose, pH6.0 with KOH, 7% (w/v) bactoagar) and propagated in soil (50:50  
1071 mix of Sun Gro germination and propagation mixes) under 16 h light/ 8 h dark cycle. T3 plants  
1072 homozygous for the constructs were confirmed by genotyping with a combination of tag-  
1073 specific (*Ypet* or *GUS*) and gene-specific primers.

1074 Fluorescence analysis of *Ypet*- and *3xYpet*-tagged lines was performed using a Zeiss  
1075 Axioplan microscope in the T1, T2, and/or T3 generations, focusing on the expression patterns  
1076 in three-day-old etiolated seedlings. T3 lines homozygous for the tagged constructs listed in  
1077 Supplemental Tables S1 to S3 were donated to the Arabidopsis Biological Resource Center.

1078

#### 1079 **GUS staining and optical clearing of plant tissues**

1080

1081 Seeds of homozygous T3 and/or T4 *GUS*-tagged lines were sterilized with 50% (v/v) commercial  
1082 bleach spiked with Triton to break seed clumps, washed five or more times with sterile water to  
1083 remove bleach, resuspended in melted and precooled sterile 0.7% (w/v) low-melting point  
1084 agarose, and plated on plain AT plates or plates supplemented with 10 µM ACC, 10 µM NPA, 10  
1085 µM ACC plus 10 µM NPA, or 50 nM NAA. After three days at 4°C to equalize germination,  
1086 seedlings were exposed to light for 1-2 hours at room temperature to restart the clock and  
1087 germinated at 22°C for three days in the dark. Seedlings were fixed in cold 90% acetone and  
1088 immediately stained for GUS overnight as described (Stepanova et al., 2005). For flower and  
1089 inflorescence analysis, transgenic T3 and T4 lines homozygous for the transgenes were grown in  
1090 soil under 16 h light/ 8 h dark cycle. Tips of inflorescences (~3 cm) were excised with small  
1091 scissors, fixed in cold 90% (v/v) acetone, stored overnight at -20°C to help remove chlorophyll,  
1092 stained for GUS as described (Stepanova et al., 2005), and then stored in 70% EtOH for several  
1093 additional days to remove residual chlorophyll prior to imaging. Etiolated 3-day-old seedlings  
1094 were fixed in 90% (v/v) acetone and optically cleared using freshly prepared ClearSee solution  
1095 (Kurihara et al., 2015) for at least 7 days. Images of inflorescences mounted on AT plates were  
1096 taken with Q Capture software on a 5.0 RTV digital camera (Q Imaging, Surrey, BC, 904 Canada)  
1097 under a Leica MZ12.5 stereomicroscope. To examine roots, hypocotyls, and flowers, samples  
1098 were mounted on glass slides and imaged with the same camera and software on a Zeiss  
1099 AxioSkop2 Plus microscope with Nomarski optics.

1100

#### 1101 **Practical guide for standard recombineering applications**

1102



1103 To make recombineering more accessible to plant researchers, we provide step-by-step  
1104 instructions on how to implement this method using the resources and tools reported in this  
1105 study.

1106

1107 (A) Perform a standard gene tagging experiment with one of the Universal recombineering  
1108 cassettes of the collection. (1) In order to insert a tag from the collection using our Universal  
1109 recombineering cassettes, first a TAC (using our Genome Browser  
1110 <https://brcwebportal.cos.ncsu.edu/plant-riboprints/ArabidopsisJBrowser/> or MATLAB  
1111 application <https://github.com/Alonso-Stepanova-Lab/Recombineering-App> for Arabidopsis) or  
1112 BAC clone containing a GOI needs to be identified. (2) Next, the TAC/BAC DNA is isolated and  
1113 transferred via electroporation to the SW105 recombineering strain. (3) Recombineering and  
1114 testing primers for the GOI are designed either using our Genome Browser or by generating the  
1115 following forward and reverse primers: Recombineering-F: 5'- 40 nt identical to the sequence  
1116 immediately upstream of the desired insertion point for the tag followed by the sequence -  
1117 GGAGGTGGAGGTGGAGCT-3'; Recombineering-R: 5'- reverse complement of the 40 nt  
1118 immediately downstream of the desired insertion point followed by the sequence -  
1119 GGCCCCAGCGGCCGAGCAG-3'. (4) The next step is to generate a recombineering amplicon  
1120 using these primers, any of the recombineering cassettes with the tag of interest as a template,  
1121 and a proofreading polymerase. (5) The amplicon is then inserted into the desired location by  
1122 recombineering as described above in the *General recombineering procedures* methods section.  
1123 (6) To test the resulting colonies, test primers flanking the insertion site and regular Taq  
1124 polymerase are employed for colony PCRs on the recombineering products. (7) Once a desired  
1125 clone is identified, the antibiotic selection sequences in the tag are removed using an *in vivo*  
1126 FLP reaction, as described in the *General recombineering procedures* methods section above.  
1127 (8) Finally, the construct is verified by re-sequencing of the integrated DNA tag and the genomic  
1128 DNA-tag junction sites using the test primers.

1129

1130 (B) Perform a trimming experiment of a TAC or BAC clone using the *FRT2-tet-FRT2* and *FRT5-*  
1131 *Amp-FRT5* cassettes. (1, 2) The first two steps of the procedure are the same as above in section  
1132 (A). (3) Then, the *FRT2-Tet-FRT2* cassette is amplified from the template using the primers  
1133 *FRT2-Tet-FRT2-F* and *FRT2-Tet-FRT2-R*. The forward *FRT2-Tet-FRT2-F* primer is comprised of: 5'-  
1134 40 nt identical to the 40 nucleotides upstream of the sequence to be deleted at the 5'-end of  
1135 the clone followed by the sequence AACGAATGCTAGTCTAGCTG-3'. For example, when using  
1136 the JAtY or KAZUSA TAC, we use the primer NewreplaBFRT2-Tet 5'-  
1137 TATATTGCTCTAATAAATTTTTGGCGCGCCGCCAATTAGCCCCGGGCGG-  
1138 TTCAAATATGTATCCGCTCATG-3'. Similarly, the reverse *FRT2-Tet-FRT2-R* primer consists of: 5'-  
1139 40 nt with the reverse complement sequence just downstream of the sequence to be deleted  
1140 at the 3'-end of the TAC or BAC clone followed by the sequenceTTACCAATGCTTAATCAGTG-3'.  
1141 (4) In parallel, the *FRT5-Amp-FRT5* cassette is amplified using the primers *FRT5-Amp-FRT5F* and  
1142 *FRT5-Amp-FRT5R*. These consist of: 5'- 40 nt identical to the 40 nucleotides upstream of the  
1143 sequence to be deleted at the 3'-end of the TAC/BAC clone followed by the sequence  
1144 AACGAATGCTAGTCTAGCTG-3' for the forward primer and 5'- 40 nt with reverse complement to  
1145 the 40 nucleotides downstream of the sequence to be deleted at the 3'-end of the TAC/BAC  
1146 clone followed by the sequence- TTAGTTGACTGTCAGCTGTC-3' for the reverse primer. When

1147 using the JAtY or KAZUSA libraries, the primer NewreplaLBFR5-Amp 5'-  
1148 TTAGTTGACTGTCAGCTGTCCTTGCTCCAGGATGCTGTTTTGACAACGG-  
1149 TTAGTTGACTGTCAGCTGTC-3' is used as a reverse primer. After generating these amplicons,  
1150 steps (5) to (8) from section (A) are followed to trim and confirm the desired deletions.

1151  
1152 *(C) Generate a recombineering cassette for a new tag using the Universal tag-generator*  
1153 *cassette*

1154 To generate a new tag, the *Universal tag-generator* cassette is provided as a ready-to-use  
1155 SW105 strain carrying the tomato BAC clone HBa0079M15 harboring the *Universal tag-*  
1156 *generator* cassette (Figure 2A). The following steps are required to generate any new tag. (1)  
1157 The tag of interest (e.g., *LUCIFERASE*) is amplified from a DNA template with a proofreading  
1158 polymerase and the primers tag-generatorF and tag-generatorR. These consist of the sequence  
1159 5'-TAAAAAGGGTTCTCGTTGCTAAGGAGGTGGAGGTGGAGCT-followed by the first 20 nucleotides  
1160 of the tag of interest-3' (it is important that the sequence of the tag starts with the first  
1161 nucleotide of the first codon of the tag) for the forward primer and 5'-  
1162 GAAAGTATAGGAACTTCCCACCTGCAGCTCCACCTGCAGC- followed by the reverse complement of  
1163 the last 20 nucleotides before the stop codon of the tag of interest-3' for the reverse primer. (2)  
1164 To replace the *RPSL* marker in the *Universal tag-generator* cassette by the *Tag-generator*  
1165 amplicon from the previous step, a standard recombineering protocol is employed as described  
1166 in the *General recombineering procedures* methods section, except that the positive  
1167 recombinant colonies are selected in LB media supplemented with streptomycin to select  
1168 against the *RPSL* gene. (3) The sequence integrity of the new tag, as well as that of the  
1169 recombination sites, is confirmed by sequencing a PCR product using primers flanking the new  
1170 tag.

1171  
1172 *(D) Perform a sequence replacement/deletion using the Universal tag-generator or the Universal*  
1173 *RPSL-Amp cassettes.* (1, 2) The first two steps of the procedure are the same as above in section  
1174 (A). (3) The *Universal tag-generator* or *Universal RPSL-Amp* amplicons are generated using a  
1175 replacementF primer with the sequence 5'-40 nt upstream of the sequence to be modified  
1176 followed by GGAGGTGGAGGTGGAGCT-3' and a replacementR primer with the sequence 5'- 40  
1177 nt reverse complementary to the 40 nt immediately downstream of the sequence to be  
1178 modified GGCCCCAGCGCCGCAGCAG -3'. (4) The sequence to be modified in the TAC/BAC  
1179 clone is replaced with the amplicon from step (3) using the standard recombineering protocol  
1180 in the *General recombineering procedures* methods section selecting for ampicillin-resistant  
1181 colonies. (5) A DNA fragment is commercially synthesized that contains the sequence with the  
1182 desired modifications/deletions flanked by at least 40 nt (preferably, 100 to 200 nt) of the  
1183 sequences homologous to the sequences flanking the inserted amplicon. (6) The replacement  
1184 sequences from the previous step are employed to replace the amplicon inserted in step (4)  
1185 using the same recombineering procedures as described above in the section *Generate a*  
1186 *recombineering cassette for a new tag using the Universal tag-generator cassette* for the  
1187 replacement of *RPSL* by the tag of interest.

1188  
1189 **Acknowledgements**

1190

1191 We are grateful to Jeonga Yun, Clara Alonso-Stepanova, Cierra Clark, Katherine Hobbet, and  
1192 Emily Nelson for technical assistance, to Dr. Robert Franks for making his equipment available  
1193 for this research, to Dr. Hobert for providing the *Venus-FRT-galk-FRT* cassette, to Dr. Ian  
1194 Bancroft for providing the JAtY TAC collection, and to Dr. Donald Court and the National Cancer  
1195 Institute for providing the SW105 strain. This work was supported by the NSF grants DBI  
1196 0820755 and MCB0519869 to JMA, MCB0923727 and IOS1444561 to JMA and ANS, and a  
1197 Programa de Movilidad fellowship PRX14/00419 from the Spanish Ministry of Science, Culture  
1198 and Sports to MAPA.

1199

## 1200 **AUTHORS CONTRIBUTIONS**

1201

1202 JMA, ANS, JB, CZ and MAPA designed the experiments and performed research. JMA, ANS, JB  
1203 and CZ wrote the manuscript. YG, DS, and APP assisted in research.

1204

1205

## 1206 **REFERENCES**

1207

1208 **Alonso, J.M. and Stepanova, A.N.** (2014). Arabidopsis transformation with large bacterial

1209 artificial chromosomes. *Methods Mol. Biol.* **1062**, 271-283, doi/10.1007/978-1-62703-580-4\_15

1210 [doi].

1211 **Alonso, J.M. and Stepanova, A.N.** (2015). A recombineering-based gene tagging system for

1212 Arabidopsis. *Methods Mol. Biol.* **1227**, 233-243, doi/10.1007/978-1-4939-1652-8\_11 [doi].

1213 **Alvarez-Buylla, E.R., Benitez, M., Corvera-Poire, A., Chaos Cador, A., de Folter, S., Gamboa de**

1214 **Buen, A., Garay-Arroyo, A., Garcia-Ponce, B., Jaimes-Miranda, F., Perez-Ruiz, R.V., Pineyro-**

1215 **Nelson, A., and Sanchez-Corrales, Y.E.** (2010). Flower development. *Arabidopsis Book* **8**, e0127,

1216 doi/10.1199/tab.0127 [doi].

1217 **Band, L.R., Wells, D.M., Fozard, J.A., Ghetiu, T., French, A.P., Pound, M.P., Wilson, M.H., Yu,**

1218 **L., Li, W., Hijazi, H.I., Oh, J., Pearce, S.P., Perez-Amador, M.A., Yun, J., Kramer, E., Alonso, J.M.,**

1219 **Godin, C., Vernoux, T., Hodgman, T.C., Pridmore, T.P., Swarup, R., King, J.R., and Bennett, M.J.**

1220 (2014). Systems analysis of auxin transport in the Arabidopsis root apex. *Plant Cell* **26**, 862-875,

1221 doi/10.1105/tpc.113.119495 [doi].

- 1222 **Begemann, M.B., Gray, B.N., January, E., Gordon, G.C., He, Y., Liu, H., Wu, X., Brutnell, T.P.,**  
1223 **Mockler, T.C., and Oufattole, M.** (2017). Precise insertion and guided editing of higher plant  
1224 genomes using Cpf1 CRISPR nucleases. *Sci. Rep.* **7**, 11606-017-11760-6, doi/10.1038/s41598-  
1225 017-11760-6 [doi].
- 1226 **Bhosale, R., Giri, J., Pandey, B.K., Giehl, R.F.H., Hartmann, A., Traini, R., Truskina, J., Leftley,**  
1227 **N., Hanlon, M., Swarup, K., Rashed, A., Voss, U., Alonso, J., Stepanova, A., Yun, J., Ljung, K.,**  
1228 **Brown, K.M., Lynch, J.P., Dolan, L., Vernoux, T., Bishopp, A., Wells, D., von Wiren, N., Bennett,**  
1229 **M.J., and Swarup, R.** (2018). A mechanistic framework for auxin dependent Arabidopsis root  
1230 hair elongation to low external phosphate. *Nat. Commun.* **9**, 1409-018-03851-3,  
1231 doi/10.1038/s41467-018-03851-3 [doi].
- 1232 **Bitrian, M., Roodbarkelari, F., Horvath, M., and Koncz, C.** (2011). BAC-recombineering for  
1233 studying plant gene regulation: developmental control and cellular localization of SnRK1 kinase  
1234 subunits. *Plant J.* **65**, 829-842, doi/10.1111/j.1365-313X.2010.04462.x; 10.1111/j.1365-  
1235 313X.2010.04462.x.
- 1236 **Brumos, J., Robles, L.M., Yun, J., Vu, T.C., Jackson, S., Alonso, J.M., and Stepanova, A.N.**  
1237 (2018). Local Auxin Biosynthesis Is a Key Regulator of Plant Development. *Dev. Cell.* **47**, 306-  
1238 318.e5, doi/S1534-5807(18)30782-2 [pii].
- 1239 **Budiman, M.A., Mao, L., Wood, T.C., and Wing, R.A.** (2000). A deep-coverage tomato BAC  
1240 library and prospects toward development of an STC framework for genome sequencing.  
1241 *Genome Res.* **10**, 129-136.

- 1242 **Cecchetti, V., Altamura, M.M., Falasca, G., Costantino, P., and Cardarelli, M.** (2008). Auxin  
1243 regulates Arabidopsis anther dehiscence, pollen maturation, and filament elongation. *Plant Cell*  
1244 **20**, 1760-1774, doi/10.1105/tpc.107.057570 [doi].
- 1245 **Cermak, T., Baltes, N.J., Cegan, R., Zhang, Y., and Voytas, D.F.** (2015). High-frequency, precise  
1246 modification of the tomato genome. *Genome Biol.* **16**, 232-015-0796-9, doi/10.1186/s13059-  
1247 015-0796-9 [doi].
- 1248 **Challa, K.R., Aggarwal, P., and Nath, U.** (2016). Activation of YUCCA5 by the Transcription  
1249 Factor TCP4 Integrates Developmental and Environmental Signals to Promote Hypocotyl  
1250 Elongation in Arabidopsis. *Plant Cell* **28**, 2117-2130, doi/10.1105/tpc.16.00360 [doi].
- 1251 **Chen, Q., Dai, X., De-Paoli, H., Cheng, Y., Takebayashi, Y., Kasahara, H., Kamiya, Y., and Zhao,**  
1252 **Y.** (2014). Auxin overproduction in shoots cannot rescue auxin deficiencies in Arabidopsis roots.  
1253 *Plant Cell Physiol.* **55**, 1072-1079, doi/10.1093/pcp/pcu039 [doi].
- 1254 **Cheng, Y., Dai, X., and Zhao, Y.** (2006). Auxin biosynthesis by the YUCCA flavin monooxygenases  
1255 controls the formation of floral organs and vascular tissues in Arabidopsis. *Genes Dev.* **20**, 1790-  
1256 1799.
- 1257 **Clough, S.J. and Bent, A.F.** (1998). Floral dip: a simplified method for Agrobacterium-mediated  
1258 transformation of Arabidopsis thaliana. **16**, 735-743.
- 1259 **Copeland, N.G., Jenkins, N.A., and Court, D.L.** (2001). Recombineering: a powerful new tool for  
1260 mouse functional genomics. *Nat. Rev. Genet.* **2**, 769-779, doi/10.1038/35093556.
- 1261 **Dahan-Meir, T., Filler-Hayut, S., Melamed-Bessudo, C., Bocobza, S., Czosnek, H., Aharoni, A.,**  
1262 **and Levy, A.A.** (2018). Efficient in planta gene targeting in tomato using geminiviral replicons  
1263 and the CRISPR/Cas9 system. *Plant J.* **95**, 5-16, doi/10.1111/tpj.13932 [doi].

- 1264 **Ejsmont, R.K., Sarov, M., Winkler, S., Lipinski, K.A., and Tomancak, P.** (2009). A toolkit for high-  
1265 throughput, cross-species gene engineering in *Drosophila*. *Nat. Methods* **6**, 435-437,  
1266 doi/10.1038/nmeth.1334.
- 1267 **Fabregas, N., Formosa-Jordan, P., Confraria, A., Siligato, R., Alonso, J.M., Swarup, R., Bennett,**  
1268 **M.J., Mahonen, A.P., Cano-Delgado, A.I., and Ibanes, M.** (2015). Auxin influx carriers control  
1269 vascular patterning and xylem differentiation in *Arabidopsis thaliana*. *PLoS Genet.* **11**,  
1270 e1005183, doi/10.1371/journal.pgen.1005183 [doi].
- 1271 **Gomez, M.D., Fuster-Almunia, C., Ocana-Cuesta, J., Alonso, J.M., and Perez-Amador, M.A.**  
1272 (2019). RGL2 controls flower development, ovule number and fertility in *Arabidopsis*. *Plant Sci.*  
1273 **281**, 82-92, doi/S0168-9452(18)31148-8 [pii].
- 1274 **Grefen, C., Donald, N., Hashimoto, K., Kudla, J., Schumacher, K., and Blatt, M.R.** (2010). A  
1275 ubiquitin-10 promoter-based vector set for fluorescent protein tagging facilitates temporal  
1276 stability and native protein distribution in transient and stable expression studies. *Plant J.* **64**,  
1277 355-365, doi/10.1111/j.1365-313X.2010.04322.x [doi].
- 1278 **Hamilton, C.M.** (1997). A binary-BAC system for plant transformation with high-molecular-  
1279 weight DNA. *Gene* **200**, 107-116, doi/S0378-1119(97)00388-0 [pii].
- 1280 **Han, S.W., Alonso, J.M., and Rojas-Pierce, M.** (2015). REGULATOR OF BULB BIOGENESIS1  
1281 (RBB1) Is Involved in Vacuole Bulb Formation in *Arabidopsis*. *PLoS One* **10**, e0125621,  
1282 doi/10.1371/journal.pone.0125621 [doi].
- 1283 **Hirose, Y., Suda, K., Liu, Y.G., Sato, S., Nakamura, Y., Yokoyama, K., Yamamoto, N., Hanano,**  
1284 **S., Takita, E., Sakurai, N., Suzuki, H., Nakamura, Y., Kaneko, T., Yano, K., Tabata, S., and**  
1285 **Shibata, D.** (2015). The *Arabidopsis* TAC Position Viewer: a high-resolution map of

- 1286 transformation-competent artificial chromosome (TAC) clones aligned with the Arabidopsis  
1287 thaliana Columbia-0 genome. *Plant J.* **83**, 1114-1122, doi/10.1111/tpj.12949 [doi].
- 1288 **Isaacs, F.J., Carr, P.A., Wang, H.H., Lajoie, M.J., Sterling, B., Kraal, L., Tolonen, A.C., Gianoulis,**  
1289 **T.A., Goodman, D.B., Reppas, N.B., Emig, C.J., Bang, D., Hwang, S.J., Jewett, M.C., Jacobson,**  
1290 **J.M., and Church, G.M.** (2011). Precise manipulation of chromosomes in vivo enables genome-  
1291 wide codon replacement. *Science* **333**, 348-353, doi/10.1126/science.1205822 [doi].
- 1292 **Kasahara, H.** (2016). Current aspects of auxin biosynthesis in plants. *Biosci. Biotechnol.*  
1293 *Biochem.* **80**, 34-42, doi/10.1080/09168451.2015.1086259 [doi].
- 1294 **Kriechbaumer, V., Wang, P., Hawes, C., and Abell, B.M.** (2012). Alternative splicing of the auxin  
1295 biosynthesis gene YUCCA4 determines its subcellular compartmentation. *Plant J.* **70**, 292-302,  
1296 doi/10.1111/j.1365-313X.2011.04866.x [doi].
- 1297 **Kurihara, D., Mizuta, Y., Sato, Y., and Higashiyama, T.** (2015). ClearSee: a rapid optical clearing  
1298 reagent for whole-plant fluorescence imaging. *Development* **142**, 4168-4179,  
1299 doi/10.1242/dev.127613 [doi].
- 1300 **Lee, M., Jung, J.H., Han, D.Y., Seo, P.J., Park, W.J., and Park, C.M.** (2012). Activation of a flavin  
1301 monooxygenase gene YUCCA7 enhances drought resistance in Arabidopsis. *Planta* **235**, 923-  
1302 938, doi/10.1007/s00425-011-1552-3 [doi].
- 1303 **Li, J., Zhang, X., Sun, Y., Zhang, J., Du, W., Guo, X., Li, S., Zhao, Y., and Xia, L.** (2018). Efficient  
1304 allelic replacement in rice by gene editing: A case study of the NRT1.1B gene. *J. Integr. Plant.*  
1305 *Biol.* **60**, 536-540, doi/10.1111/jipb.12650 [doi].

1306 **Liu, Y.G., Liu, H., Chen, L., Qiu, W., Zhang, Q., Wu, H., Yang, C., Su, J., Wang, Z., Tian, D., and**  
1307 **Mei, M.** (2002). Development of new transformation-competent artificial chromosome vectors  
1308 and rice genomic libraries for efficient gene cloning. *Gene* **282**, 247-255.

1309 **Mashiguchi, K., Tanaka, K., Sakai, T., Sugawara, S., Kawaide, H., Natsume, M., Hanada, A.,**  
1310 **Yaeno, T., Shirasu, K., Yao, H., McSteen, P., Zhao, Y., Hayashi, K., Kamiya, Y., and Kasahara, H.**  
1311 (2011). The main auxin biosynthesis pathway in Arabidopsis. *Proc. Natl. Acad. Sci. U. S. A.* **108**,  
1312 18512-18517, doi/10.1073/pnas.1108434108.

1313 **Peret, B., Swarup, K., Ferguson, A., Seth, M., Yang, Y., Dhondt, S., James, N., Casimiro, I.,**  
1314 **Perry, P., Syed, A., Yang, H., Reemmer, J., Venison, E., Howells, C., Perez-Amador, M.A., Yun,**  
1315 **J., Alonso, J., Beemster, G.T., Laplaze, L., Murphy, A., Bennett, M.J., Nielsen, E., and Swarup,**  
1316 **R.** (2012a). AUX/LAX genes encode a family of auxin influx transporters that perform distinct  
1317 functions during Arabidopsis development. *Plant Cell* **24**, 2874-2885,  
1318 doi/10.1105/tpc.112.097766 [doi].

1319 **Peret, B., Swarup, K., Ferguson, A., Seth, M., Yang, Y., Dhondt, S., James, N., Casimiro, I.,**  
1320 **Perry, P., Syed, A., Yang, H., Reemmer, J., Venison, E., Howells, C., Perez-Amador, M.A., Yun,**  
1321 **J., Alonso, J., Beemster, G.T., Laplaze, L., Murphy, A., Bennett, M.J., Nielsen, E., and Swarup,**  
1322 **R.** (2012b). AUX/LAX genes encode a family of auxin influx transporters that perform distinct  
1323 functions during Arabidopsis development. *Plant Cell* **24**, 2874-2885,  
1324 doi/10.1105/tpc.112.097766 [doi].

1325 **Pietra, S., Gustavsson, A., Kiefer, C., Kalmbach, L., Horstedt, P., Ikeda, Y., Stepanova, A.N.,**  
1326 **Alonso, J.M., and Grebe, M.** (2013). Arabidopsis SABRE and CLASP interact to stabilize cell



1327 division plane orientation and planar polarity. *Nat. Commun.* **4**, 2779,  
1328 doi/10.1038/ncomms3779 [doi].

1329 **Poser, I., Sarov, M., Hutchins, J.R., Heriche, J.K., Toyoda, Y., Pozniakovsky, A., Weigl, D.,**  
1330 **Nitzsche, A., Hegemann, B., Bird, A.W., Pelletier, L., Kittler, R., Hua, S., Naumann, R.,**  
1331 **Augsburg, M., Sykora, M.M., Hofemeister, H., Zhang, Y., Nasmyth, K., White, K.P., Dietzel, S.,**  
1332 **Mechtler, K., Durbin, R., Stewart, A.F., Peters, J.M., Buchholz, F., and Hyman, A.A.** (2008). BAC  
1333 TransgeneOmics: a high-throughput method for exploration of protein function in mammals.  
1334 *Nat. Methods* **5**, 409-415, doi/10.1038/nmeth.1199.

1335 **Ruzicka, K., Ljung, K., Vanneste, S., Podhorska, R., Beeckman, T., Friml, J., and Benkova, E.**  
1336 (2007). Ethylene Regulates Root Growth through Effects on Auxin Biosynthesis and Transport-  
1337 Dependent Auxin Distribution. *Plant Cell* **19**, 2197-2212.

1338 **Sabatini, S., Beis, D., Wolkenfelt, H., Murfett, J., Guilfoyle, T., Malamy, J., Benfey, P., Leyser,**  
1339 **O., Bechtold, N., Weisbeek, P., and Scheres, B.** (1999). An auxin-dependent distal organizer of  
1340 pattern and polarity in the Arabidopsis root. *Cell* **99**, 463-472.

1341 **Sandvang, D.** (1999). Novel streptomycin and spectinomycin resistance gene as a gene cassette  
1342 within a class 1 integron isolated from *Escherichia coli*. *Antimicrob. Agents Chemother.* **43**,  
1343 3036-3038.

1344 **Sarov, M., Schneider, S., Pozniakovski, A., Roguev, A., Ernst, S., Zhang, Y., Hyman, A.A., and**  
1345 **Stewart, A.F.** (2006). A recombineering pipeline for functional genomics applied to  
1346 *Caenorhabditis elegans*. *Nat. Methods* **3**, 839-844, doi/10.1038/nmeth933.

1347 **Sarov, M., Murray, J.I., Schanze, K., Pozniakovski, A., Niu, W., Angermann, K., Hasse, S.,**  
1348 **Rupprecht, M., Vinis, E., Tinney, M., Preston, E., Zinke, A., Enst, S., Teichgraber, T., Janette, J.,**

- 1349 **Reis, K., Janosch, S., Schloissnig, S., Ejsmont, R.K., Slightam, C., Xu, X., Kim, S.K., Reinke, V.,**  
1350 **Stewart, A.F., Snyder, M., Waterston, R.H., and Hyman, A.A.** (2012). A genome-scale resource  
1351 for in vivo tag-based protein function exploration in *C. elegans*. *Cell* **150**, 855-866,  
1352 doi/10.1016/j.cell.2012.08.001; 10.1016/j.cell.2012.08.001.
- 1353 **Sarov, M., Barz, C., Jambor, H., Hein, M.Y., Schmied, C., Suchold, D., Stender, B., Janosch, S.,**  
1354 **K, J.V.V., Krishnan, R.T., Krishnamoorthy, A., Ferreira, I.R., Ejsmont, R.K., Finkl, K., Hasse, S.,**  
1355 **Kampfer, P., Plewka, N., Vinis, E., Schloissnig, S., Knust, E., Hartenstein, V., Mann, M.,**  
1356 **Ramaswami, M., VijayRaghavan, K., Tomancak, P., and Schnorrer, F.** (2016). A genome-wide  
1357 resource for the analysis of protein localisation in *Drosophila*. *Elife* **5**, e12068,  
1358 doi/10.7554/eLife.12068 [doi].
- 1359 **Schlake, T. and Bode, J.** (1994). Use of mutated FLP recognition target (FRT) sites for the  
1360 exchange of expression cassettes at defined chromosomal loci. *Biochemistry* **33**, 12746-12751.
- 1361 **Smyth, D.R., Bowman, J.L., and Meyerowitz, E.M.** (1990). Early flower development in  
1362 *Arabidopsis*. *Plant Cell* **2**, 755-767, doi/10.1105/tpc.2.8.755 [doi].
- 1363 **Soyars, C.L., Peterson, B.A., Burr, C.A., and Nimchuk, Z.L.** (2018). Cutting Edge Genetics:  
1364 CRISPR/Cas9 Editing of Plant Genomes. *Plant Cell Physiol.* **59**, 1608-1620,  
1365 doi/10.1093/pcp/pcy079 [doi].
- 1366 **Stepanova, A.N., Robertson-Hoyt, J., Yun, J., Benavente, L.M., Xie, D., Dolezal, K., Schlereth,**  
1367 **A., Jurgens, G., and Alonso, J.M.** (2008). TAA1-mediated auxin biosynthesis is essential for  
1368 hormone crosstalk and plant development *Cell* **133**, 177-191.

- 1369 **Stepanova, A.N., Hoyt, J.M., Hamilton, A.A., and Alonso, J.M.** (2005). A Link between ethylene  
1370 and auxin uncovered by the characterization of two root-specific ethylene-insensitive mutants  
1371 in Arabidopsis. *Plant Cell* **17**, 2230-2242.
- 1372 **Stepanova, A.N., Yun, J., Likhacheva, A.V., and Alonso, J.M.** (2007). Multilevel interactions  
1373 between ethylene and auxin in Arabidopsis roots. *Plant Cell* **19**, 2169-2185.
- 1374 **Stepanova, A.N., Yun, J., Robles, L.M., Novak, O., He, W., Guo, H., Ljung, K., and Alonso, J.M.**  
1375 (2011). The Arabidopsis YUCCA1 Flavin Monooxygenase Functions in the Indole-3-Pyruvic Acid  
1376 Branch of Auxin Biosynthesis. *Plant Cell* **23**, 3961-3973, doi/10.1105/tpc.111.088047.
- 1377 **Sugawara, S., Hishiyama, S., Jikumaru, Y., Hanada, A., Nishimura, T., Koshiba, T., Zhao, Y.,**  
1378 **Kamiya, Y., and Kasahara, H.** (2009). Biochemical analyses of indole-3-acetaldoxime-dependent  
1379 auxin biosynthesis in Arabidopsis. *Proc. Natl. Acad. Sci. U. S. A.*, doi/10.1073/pnas.0811226106.
- 1380 **Swarup, R., Perry, P., Hagenbeek, D., Van Der Straeten, D., Beemster, G.T., Sandberg, G.,**  
1381 **Bhalerao, R., Ljung, K., and Bennett, M.J.** (2007). Ethylene upregulates auxin biosynthesis in  
1382 Arabidopsis seedlings to enhance inhibition of root cell elongation. *Plant Cell* **19**, 2186-2196.
- 1383 **Tam, Y.Y. and Normanly, J.** (1998). Determination of indole-3-pyruvic acid levels in Arabidopsis  
1384 thaliana by gas chromatography-selected ion monitoring-mass spectrometry. *J. Chromatogr. A*  
1385 **800**, 101-108, doi/S0021-9673(97)01051-0 [pii].
- 1386 **Tao, Y., Ferrer, J.L., Ljung, K., Pojer, F., Hong, F., Long, J.A., Li, L., Moreno, J.E., Bowman, M.E.,**  
1387 **Ivans, L.J., Cheng, Y., Lim, J., Zhao, Y., Ballare, C.L., Sandberg, G., Noel, J.P., and Chory, J.**  
1388 (2008). Rapid synthesis of auxin via a new tryptophan-dependent pathway is required for shade  
1389 avoidance in plants. *Cell* **133**, 164-176, doi/10.1016/j.cell.2008.01.049.

1390 **Tian, G.W., Mohanty, A., Chary, S.N., Li, S., Paap, B., Drakakaki, G., Kopec, C.D., Li, J.,**  
1391 **Ehrhardt, D., Jackson, D., Rhee, S.Y., Raikhel, N.V., and Citovsky, V.** (2004). High-throughput  
1392 fluorescent tagging of full-length Arabidopsis gene products in planta. *Plant Physiol.* **135**, 25-38.  
1393 **Tiwari, S.B., Wang, X.J., Hagen, G., and Guilfoyle, T.J.** (2001). AUX/IAA proteins are active  
1394 repressors, and their stability and activity are modulated by auxin. *Plant Cell* **13**, 2809-2822,  
1395 doi/10.1105/tpc.010289 [doi].  
1396 **Turan, S., Zehe, C., Kuehle, J., Qiao, J., and Bode, J.** (2013). Recombinase-mediated cassette  
1397 exchange (RMCE) - a rapidly-expanding toolbox for targeted genomic modifications. *Gene* **515**,  
1398 1-27, doi/10.1016/j.gene.2012.11.016 [doi].  
1399 **Tursun, B., Cochella, L., Carrera, I., and Hobert, O.** (2009). A toolkit and robust pipeline for the  
1400 generation of fosmid-based reporter genes in *C. elegans*. *PLoS One* **4**, e4625,  
1401 doi/10.1371/journal.pone.0004625.  
1402 **Vanneste, S. and Friml, J.** (2009). Auxin: a trigger for change in plant development. *Cell* **136**,  
1403 1005-1016, doi/10.1016/j.cell.2009.03.001.  
1404 **Vaseva, I.I., Qudeimat, E., Potuschak, T., Du, Y., Genschik, P., Vandenbussche, F., and Van Der**  
1405 **Straeten, D.** (2018). The plant hormone ethylene restricts Arabidopsis growth via the  
1406 epidermis. *Proc. Natl. Acad. Sci. U. S. A.* **115**, E4130-E4139, doi/10.1073/pnas.1717649115 [doi].  
1407 **Venken, K.J., He, Y., Hoskins, R.A., and Bellen, H.J.** (2006). P[acman]: a BAC transgenic platform  
1408 for targeted insertion of large DNA fragments in *D. melanogaster*. *Science* **314**, 1747-1751,  
1409 doi/10.1126/science.1134426.

- 1410 **Venken, K.J., Kasprowicz, J., Kuenen, S., Yan, J., Hassan, B.A., and Verstreken, P. (2008).**  
1411 Recombineering-mediated tagging of Drosophila genomic constructs for in vivo localization and  
1412 acute protein inactivation. *Nucleic Acids Res.* **36**, e114, doi/10.1093/nar/gkn486.
- 1413 **Venken, K.J., Carlson, J.W., Schulze, K.L., Pan, H., He, Y., Spokony, R., Wan, K.H., Koriabine,**  
1414 **M., de Jong, P.J., White, K.P., Bellen, H.J., and Hoskins, R.A. (2009).** Versatile P[acman] BAC  
1415 libraries for transgenesis studies in *Drosophila melanogaster*. *Nat. Methods* **6**, 431-434,  
1416 doi/10.1038/nmeth.1331.
- 1417 **Villarino, G.H., Hu, Q., Manrique, S., Flores-Vergara, M., Sehra, B., Robles, L., Brumos, J.,**  
1418 **Stepanova, A.N., Colombo, L., Sundberg, E., Heber, S., and Franks, R.G. (2016).** Transcriptomic  
1419 Signature of the SHATTERPROOF2 Expression Domain Reveals the Meristematic Nature of  
1420 Arabidopsis Gynoecial Medial Domain. *Plant Physiol.* **171**, 42-61, doi/10.1104/pp.15.01845  
1421 [doi].
- 1422 **Wang, Y. and Jiao, Y. (2018).** Auxin and above-ground meristems. *J. Exp. Bot.* **69**, 147-154,  
1423 doi/10.1093/jxb/erx299 [doi].
- 1424 **Warming, S., Costantino, N., Court, D.L., Jenkins, N.A., and Copeland, N.G. (2005).** Simple and  
1425 highly efficient BAC recombineering using galK selection. *Nucleic Acids Res.* **33**, e36.
- 1426 **Worden, N., Wilkop, T.E., Esteve, V.E., Jeannotte, R., Lathe, R., Vernhettes, S., Weimer, B.,**  
1427 **Hicks, G., Alonso, J., Labavitch, J., Persson, S., Ehrhardt, D., and Drakakaki, G. (2015).** CESA  
1428 TRAFFICKING INHIBITOR inhibits cellulose deposition and interferes with the trafficking of  
1429 cellulose synthase complexes and their associated proteins KORRIGAN1 and POM2/CELLULOSE  
1430 SYNTHASE INTERACTIVE PROTEIN1. *Plant Physiol.* **167**, 381-393, doi/10.1104/pp.114.249003  
1431 [doi].

- 1432 **Xu, Y., Prunet, N., Gan, E.S., Wang, Y., Stewart, D., Wellmer, F., Huang, J., Yamaguchi, N.,**  
1433 **Tatsumi, Y., Kojima, M., Kiba, T., Sakakibara, H., Jack, T.P., Meyerowitz, E.M., and Ito, T.**  
1434 (2018). SUPERMAN regulates floral whorl boundaries through control of auxin biosynthesis.  
1435 EMBO J. **37**, 10.15252/embj.201797499. Epub 2018 May 15, doi/e97499 [pii].
- 1436 **Yamada, M., Greenham, K., Prigge, M.J., Jensen, P.J., and Estelle, M.** (2009). The TRANSPORT  
1437 INHIBITOR RESPONSE2 gene is required for auxin synthesis and diverse aspects of plant  
1438 development. Plant Physiol. **151**, 168-179, doi/10.1104/pp.109.138859.
- 1439 **Yanagisawa, M., Alonso, J.M., and Szymanski, D.B.** (2018). Microtubule-Dependent  
1440 Confinement of a Cell Signaling and Actin Polymerization Control Module Regulates Polarized  
1441 Cell Growth. Curr. Biol. **28**, 2459-2466.e4, doi/S0960-9822(18)30712-7 [pii].
- 1442 **Yu, D., Ellis, H.M., Lee, E.C., Jenkins, N.A., Copeland, N.G., and Court, D.L.** (2000). An efficient  
1443 recombination system for chromosome engineering in Escherichia coli. Proc. Natl. Acad. Sci. U.  
1444 S. A. **97**, 5978-5983.
- 1445 **Yu, Q.H., Wang, B., Li, N., Tang, Y., Yang, S., Yang, T., Xu, J., Guo, C., Yan, P., Wang, Q., and**  
1446 **Asmutola, P.** (2017). CRISPR/Cas9-induced Targeted Mutagenesis and Gene Replacement to  
1447 Generate Long-shelf Life Tomato Lines. Sci. Rep. **7**, 11874-017-12262-1, doi/10.1038/s41598-  
1448 017-12262-1 [doi].
- 1449 **Yuan, Q., Liang, F., Hsiao, J., Zismann, V., Benito, M.I., Quackenbush, J., Wing, R., and Buell, R.**  
1450 (2000). Anchoring of rice BAC clones to the rice genetic map in silico. Nucleic Acids Res. **28**,  
1451 3636-3641, doi/10.1093/nar/28.18.3636 [doi].
- 1452 **Zhang, J., Chen, L.L., Sun, S., Kudrna, D., Copetti, D., Li, W., Mu, T., Jiao, W.B., Xing, F., Lee, S.,**  
1453 **Talag, J., Song, J.M., Du, B., Xie, W., Luo, M., Maldonado, C.E., Goicoechea, J.L., Xiong, L., Wu,**

1454 **C., Xing, Y., Zhou, D.X., Yu, S., Zhao, Y., Wang, G., Yu, Y., Luo, Y., Hurtado, B.E., Danowitz, A.,**  
1455 **Wing, R.A., and Zhang, Q.** (2016). Building two indica rice reference genomes with PacBio long-  
1456 read and Illumina paired-end sequencing data. *Sci. Data* **3**, 160076, doi/10.1038/sdata.2016.76  
1457 [doi].

1458 **Zhang, T.Q., Xu, Z.G., Shang, G.D., and Wang, J.W.** (2019). A Single-Cell RNA Sequencing  
1459 Profiles the Developmental Landscape of Arabidopsis Root. *Mol. Plant.* **12**, 648-660, doi/S1674-  
1460 2052(19)30133-9 [pii].

1461 **Zhao, Y.** (2018). Essential Roles of Local Auxin Biosynthesis in Plant Development and in  
1462 Adaptation to Environmental Changes. *Annu. Rev. Plant. Biol.* **69**, 417-435,  
1463 doi/10.1146/annurev-arplant-042817-040226 [doi].

1464 **Zhou, R., Benavente, L.M., Stepanova, A.N., and Alonso, J.M.** (2011). A recombineering-based  
1465 gene tagging system for Arabidopsis. *Plant J.* **66**, 712-723, doi/10.1111/j.1365-  
1466 313X.2011.04524.x; 10.1111/j.1365-313X.2011.04524.x.

1467

## 1468 **FIGURE LEGENDS**

1469

### 1470 **Figure 1. Timeline comparison between the classical and new accelerated recombineering.**

1471 **(A)** The first step in any recombineering experiment is the identification of a genomic clone  
1472 (typically a TAC or a BAC) containing the gene or sequences of interest. **(B)** In the classical *galk*-  
1473 based system, the *galk* positive/negative selectable marker is amplified using a pair of primers  
1474 that contain at least 40 nucleotides of sequence corresponding to the sequence flanking the  
1475 desired insertion site in the target genomic DNA clone. In this example, the amplification of the  
1476 *galk* cassette with the GS1 and GS2 primers will result in the production of an amplicon (GS1-

1477 *galk-GS2*) that will target the *galk* selectable marker to the 3' of the gene just before the stop  
1478 codon. The electroporation of this amplicon in a recombineering competent *E. coli* strain such  
1479 as SW105 and the selection of the *galk*-positive colonies will result in a clone containing the  
1480 *galk* marker just before the stop codon in the gene of interest (second panel). Using the same  
1481 set of primers used to amplify the *galk* cassette, a *TAG/AnyDNA* cassette (such as *GFP*) is  
1482 amplified (third panel) and used to replace *galk* by the *TAG/AnyDNA* sequence (bottom panel).  
1483 This sequence replacement can be accomplished by electroporating the *GS1-TAG/AnyDNA-GS2*  
1484 amplicon into the recombineering cells carrying the gene of interest tagged with *galk* and  
1485 selecting for clones that lost *galk* in minimum media supplemented with 2-deoxy-galactose.  
1486 Only *galk*-negative colonies will survive in the presence of this chemical. **(C)** The faster and  
1487 user-friendly bifunctional cassette system combines the selectable marker (such as *galk* or an  
1488 antibiotic resistance gene) and the tag of interest in a single cassette (top panel). By flanking  
1489 the sequences of the selectable marker with the flipase (FLP) recognition target sites (*FRTs*), the  
1490 selectable marker sequence can be readily removed post-insertion by a highly efficient *in vivo*  
1491 FLP reaction. Similarly to the classical approach, the bifunctional large cassette, *GS1-5'UA-*  
1492 *TAG/AnyDNA-FRT-galk/AmpR-FRT-5'UA-GS2* is first amplified with a pair of primers, *GS1* and  
1493 *GS2* (second panel), to add the gene-specific sequences that will target the recombineering  
1494 cassette to the desired location in the gene. By electroporating this cassette into the  
1495 recombineering *E. coli* strain SW105 containing the gene of interest and selecting for, in this  
1496 example, ampicillin-resistant clones, the bacteria with the desired construct can be efficiently  
1497 and rapidly identified (third panel). Finally, the induction of FLP recombinase already  
1498 engineered in the *SW105* strain would result in the removal of the sequences corresponding to



1499 the selectable marker (bottom panel), leading to the tag containing the reporter or epitope of  
1500 interest followed by a 36-nt-long *FRT*-containing scar that encodes 12 extra amino acids. The  
1501 approximate time period required in each step is indicated. The GS1 primer should have the  
1502 following structure: 5'-40nt just upstream of the nucleotide after which you want to insert your  
1503 tag followed by the 5'UA sequence -ggaggtggaggtggagct -3'. Similarly, the GS2 primer should  
1504 have the structure: 5'- 40nt corresponding to the reverse complement of the sequence just  
1505 downstream of the nucleotide in front of which you want to insert your tag followed by the  
1506 3'UA sequence ggccccagcgcccgagcagcacc-3'.

1507

1508 **Figure 2. Schematic representation of two applications for the *tag-generator* cassette.**

1509 A *tag-generator* cassette consisting of the negative selectable marker gene *RPSL* and a positive  
1510 selectable marker *Amp<sup>R</sup>* conferring ampicillin resistance can be used for the easy generation of  
1511 new bifunctional recombineering cassettes containing any desired tag **(A)**, or to make precise  
1512 gene editing (such as introducing point mutations, deletions, or insertions) in the gene of  
1513 interest **(B)**. To facilitate the use of this *tag-generator* cassette, in addition to the negative  
1514 (*RPSL*) and positive (*Amp<sup>R</sup>*) selectable markers, the construct contains the 5' and 3' universal  
1515 adaptors (UA) that allow for the amplification of any recombineering cassette in our collection  
1516 (see below) and the *TGR* sequence that allows for the in-frame insertion of any tag, making it  
1517 possible to use the resulting cassettes in tagging experiments at any position in the gene of  
1518 interest (N-terminal, C-terminal, or internal). Finally, this cassette also includes *FRT* sites  
1519 flanking the sequences conferring ampicillin resistance (*Amp<sup>R</sup>*) allowing for the precise and  
1520 efficient elimination of the selectable marker gene post-insertion. The *tag-generator* cassette

1521 can be used to construct new recombineering cassettes. **(A)** A ready-to-use SW105 *E. coli* strain  
1522 containing a TAC clone that harbors the *tag-generator* cassette has been constructed (top  
1523 panel). Using the primers TGF (5'-TAAAAGGGTTCTCGTTGCTAAGGAGGTGGAGGTGGAGCT-3' in-  
1524 frame with 20 nucleotides of the 5' of the new tag) and TGR (5'-  
1525 gaaagtataggaacttcccacctgcagctccacctgcagc-3' in frame with 20 nucleotides that anneal to the 3'  
1526 end of the tag of interest), the tag of interest (*TAG/AnyDNA*) can be amplified generating the  
1527 5'UA-*TAG/AnyDNA-TGR* amplicon (middle panel). By electroporating this amplicon in the  
1528 SW105 recombineering strain carrying the *tag-generator* cassette and selecting for the absence  
1529 of *RPSL* (streptomycin-resistant colonies), a new bifunctional recombineering cassette for the  
1530 tag of interest will be obtained (bottom panel). **(B)** The tag generator cassette can also be used  
1531 in a two-step recombination procedure similar to the classical *galK* approach to make any type  
1532 of sequence modification, such as seamless insertion of a tag, introduction of point mutations,  
1533 etc. In this case, the process starts with the identification of the genomic clone containing the  
1534 gene of interest (top panel). Using GS1 and GS2 primers (see figure 1) to PCR-amplify the *tag-*  
1535 *generator* cassette, an amplicon containing the sequences flanking the point where the gene  
1536 editing will take place is obtained (second panel). By electroporating this amplicon in SW105  
1537 recombineering cells carrying the BAC or TAC clone with the desired gene and selecting for  
1538 ampicillin-resistant colonies, the gene of interest is tagged with the *tag-generator* cassette  
1539 (third panel). Next, a replacement DNA construct containing the edited sequence (point  
1540 mutations, deletions, insertions, etc. depicted as a red box in the fourth panel) flanked by long  
1541 regions of homology to the gene of interest (100 to 200 base pairs on each side of the region to  
1542 be edited are recommended) is produced, typically, by commercial DNA synthesis. When

1543 designing these constructs, it is important to consider that recombination can take place at any  
1544 point within the regions of homology between the replacement sequence and the gene of  
1545 interest tagged with the *tag-generator* cassette (bottom panel). By electroporating the  
1546 replacement DNA and selecting for colonies resistant to streptomycin, the desired final product  
1547 is obtained (bottom panel).

1548

1549 **Figure 3. Schematic representation of two applications for the trimming cassettes.**

1550 Two trimming cassettes, one conferring tetracycline resistance and another conferring  
1551 ampicillin resistance, have been generated to facilitate the elimination of undesired sequences  
1552 in TAC or BAC clones, as well as for the efficient transfer of large fragments of DNA from BAC  
1553 clones to binary vectors. To make these actions possible, each antibiotic selectable marker in  
1554 the trimming cassettes is flanked by a different pair of orthogonal *FRT* sequences, *FRT2* or *FRT5*,  
1555 that not only allow for the elimination of the antibiotic-resistance sequences after the trimming  
1556 process **(A)**, but also for the efficient *in vivo* transfer of large fragments of DNA from a BAC or  
1557 TAC clone to a modified binary vector **(B)**. **(A)** The first step in the process of trimming a  
1558 genomic sequence is to identify a BAC or TAC clone carrying the gene of interest (top panel).  
1559 Using DNA for the ready-to-use *FRT2-Tet-FRT2* and *FRT5-Amp-FRT5* trimming cassettes as PCR  
1560 templates and two pairs of primers, *FRT2F/FRT2R*, and *FRT5F/FRT5R* (see sequences  
1561 characteristics below), two amplicons containing the sequences of the trimming cassettes  
1562 flanked by 40 nucleotides homologous to the sequences flanking the region to be deleted in the  
1563 target genomic DNA are produced by PCR (second panel). Electroporating these amplicons into  
1564 electrocompetent SW105 cells carrying the TAC clone harboring the gene of interest and

1565 selecting for colonies resistant to both ampicillin and tetracycline results in the replacement of  
1566 the undesired genomic DNA sequences by the trimming cassette sequences (third panel).  
1567 Inducing the expression of the *FLP* recombinase present in the genome of the SW105 cells  
1568 results in the elimination of the ampicillin and tetracycline selectable sequences, leaving behind  
1569 a single *FRT2* and *FRT5* site at each flank, respectively (bottom panel). **(B)** The trimming product  
1570 obtained in (A) contains the desired genomic DNA fragment flanked by two orthogonal *FRT*  
1571 sites opening the possibility of using cassette-exchange strategies to move this potentially large  
1572 DNA from the original BAC/TAC to a binary vector. To generate binary vectors suitable for this  
1573 cassette-exchange reaction, we first generated a derivative of the Gateway pDONR221 vector  
1574 containing the negative selectable marker *SacB* flanked by the head-to-toe *FRT2* and *FRT5* sites  
1575 (top panel). Using this new vector, the *FRT2-SacB-FRT5* cassette can be easily transferred to any  
1576 attR1-attR2-containing destination vector such as pGWB1 (top panel). To transfer the genomic  
1577 DNA fragment flanked by the *FRT2* and *FRT5* sites to the pGWB1-FRT2-SacB-FRT5 vector,  
1578 SW105 cells carrying the trimmed BAC or TAC clone (from bottom panel in (A)) can be  
1579 electroporated with the pGWB1-FRT2-SacB-FRT5 vector. In the presence of sucrose (negative  
1580 selection for the *SacB* gene) and hygromycin (positive selection for the pGWB1 backbone), the  
1581 product of a successful cassette-exchange reaction can be efficiently selected. Dark green  
1582 arrows indicate resistant genes that work both in plants and bacteria. The primers used to  
1583 amplify the trimming cassettes have the following structure. *FRT2* F: 5'-40nt corresponding to  
1584 the sequence upstream of the nucleotide in front of which one wants to insert the *FRT2* site  
1585 followed by the sequence -ttcaaatatgtatccgctca -3'. *FRT2* R: 5'- 40nt corresponding to the  
1586 reverse complement sequence downstream of the nucleotide after which one wants to insert

1587 the *FRT2* site followed by the sequence -ttaccaatgcttaatcagtg -3'. *FRT5* F: 5'-40nt corresponding  
1588 to the sequence upstream of the nucleotide in front of which one wants to insert the *FRT5* site-  
1589 aacgaatgctagctagctg-3'. *FRT5* R: 5'-40nt corresponding to the reverse complement sequence  
1590 downstream of the nucleotide after which one wants to insert the *FRT5* site-  
1591 ttagttgactgtcagctg-3'.

1592

1593 **Figure 4. Schematic representation of the high-throughput recombineering pipeline.**

1594 The process starts by growing 96 DH10B strains carrying the desired TAC clones (best TAC  
1595 clones from the two available *Arabidopsis* libraries for any given gene can be found in our  
1596 genome browser at <https://brcwebportal.cos.ncsu.edu/plant-riboprints/ArabidopsisJBrowser>)  
1597 in a 96-deep-well plate (1). The cells are pelleted by centrifugation and a 96-well-format  
1598 alkaline-lysis DNA miniprep protocol is used to obtain DNA for the corresponding 96 TACs (2).  
1599 Electrocompetent SW105 cells are prepared and aliquoted into a 96-well electroporator  
1600 cuvette (3). DNA for each of the selected 96 TAC clones is added to the electroporation cuvette  
1601 wells and electroporated into the SW105 competent cells (4). After the electroporation, cells  
1602 are resuspended in LB and transferred to a 96-deep-well plate where they are allowed to  
1603 recover before they are plated in selectable media. Individual clones grown in the selectable  
1604 media are tested by PCR and arranged back into a 96-well format (dashed arrow indicates that  
1605 several steps are not shown) (5). The SW105 strains carrying 96 TAC clones selected in step 5  
1606 are grown overnight in a 96-deep-well plate (6). Cells from the overnight culture are used to  
1607 inoculate 8 cultures corresponding to pools of 12 clones each (7). Electrocompetent cells from  
1608 each of the 8 pools of 12 clones are prepared (8). Aliquots of cells from each pool are placed

1609 into the wells of the corresponding rows of the 96-well electroporation cuvette. For example,  
1610 from pool one, 12 identical aliquots would be placed in each of the wells of the first row of the  
1611 96-well electroporation cuvette and so on (9). In parallel, a pair of 60mers per gene are designed  
1612 (primer sequences for generating N- and C-terminal amplicons for any gene and any of our  
1613 ready-to-use recombineering cassettes can be obtained from our genome browser at  
1614 <https://brcwebportal.cos.ncsu.edu/plant-riboprints/ArabidopsisJBrowser>) (10) and used to  
1615 generate the corresponding 96 amplicons using the DNA from one of our ready-to-use cassettes  
1616 as a template (11). The amplicons are purified by simple chloroform extraction and ethanol  
1617 precipitation in a 96-well plate (12). The corresponding 96 amplicons are added to the  
1618 electrocompetent cells and electroporated in the 96-well electroporation cuvette (13). As  
1619 before, the cells are resuspended in LB and transferred to a 96-deep-well plate to allow them to  
1620 recover (14). The cells from each transformation are then streaked in LB plates with the proper  
1621 antibiotic (15). Individual colonies (one or two per construct) are examined by colony PCR using  
1622 a combination of gene- and tag-specific primers and the integrity and fidelity of the  
1623 recombination is checked by PCR fragment sequencing.

1624

1625 **Figure 5. GUS staining patterns of translational recombineering fusions of auxin biosynthesis**  
1626 **genes and *DR5:GUS* in roots.**

1627 Seedlings were germinated for three days in the dark in control AT media or in AT media  
1628 supplemented with 10uM NPA, 10uM ACC, 10uM NPA + 10uM ACC, or 50nM NAA. Samples  
1629 were optically cleared with ClearSee.

1630

1631 **Figure 6. GUS staining patterns of translational recombineering fusions of auxin biosynthesis**  
1632 **genes and *DR5:GUS* in shoots.**

1633 Seedlings were germinated for three days in the dark in control AT media or in AT media  
1634 supplemented with 10uM NPA, 10uM ACC, 10uM NPA + 10uM ACC, or 50nM NAA. Samples  
1635 were optically cleared with ClearSee.

1636

1637 **Figure 7. GUS staining patterns of translational recombineering fusions of auxin biosynthesis**  
1638 **genes and *DR5:GUS* in inflorescences and flowers.** Images of individual flowers represent the

1639 enlarged versions of the boxed areas of inflorescences. Red arrows mark the GUS activity  
1640 domains of interest highlighted in the text. Black scale bars in the inflorescence images  
1641 correspond to 2.5 mm. White scale bars in the flower pictures represent 250 mm. The samples  
1642 of *DR5:GUS* and the *TAA1* recombineering fusion with *GUS* have been optically cleared with  
1643 ClearSee to enable visualization of GUS activity in the ovules and developing seeds.

1644

1645

1646

1647

1648

1649

1650

1651

1652

1653 **Table 1.** Efficiency of DNA transfer from the BAC IGF F20D22 to pGWB1-FRT2-SacB-FRT5  
 1654 vectors and pYLTAC17-FRT2-SacB-FRT5-Spec-Kan

|                            |                  | pGWB1-FRT2-SacB-FRT5  |                   |      | pYLTAC17-FRT2-SacB-FRT5-Spec-Kan |                   |     |
|----------------------------|------------------|-----------------------|-------------------|------|----------------------------------|-------------------|-----|
|                            |                  | Colony number for PCR | Positive colonies | %    | Colony number for PCR            | Positive colonies | %   |
| 1 <sup>st</sup> experiment | JMA2364 (~16 kb) | 10                    | 8                 | 80   | 10                               | 10                | 100 |
|                            | JMA2365 (~37 kb) | 7                     | 5                 | 71.4 | 10                               | 10                | 100 |
|                            | JMA2366 (~78 kb) | 3                     | 1                 | 33.3 | 10                               | 10                | 100 |
| 2 <sup>nd</sup> experiment | JMA2364 (~16 kb) | 10                    | 10                | 100  | 10                               | 10                | 100 |
|                            | JMA2365 (~37 kb) | 10                    | 9                 | 90   | 10                               | 10                | 100 |
|                            | JMA2366 (~78 kb) | 6                     | 3                 | 50   | 10                               | 9                 | 90  |

1655

1656

1657

1658

1659



Figure 1

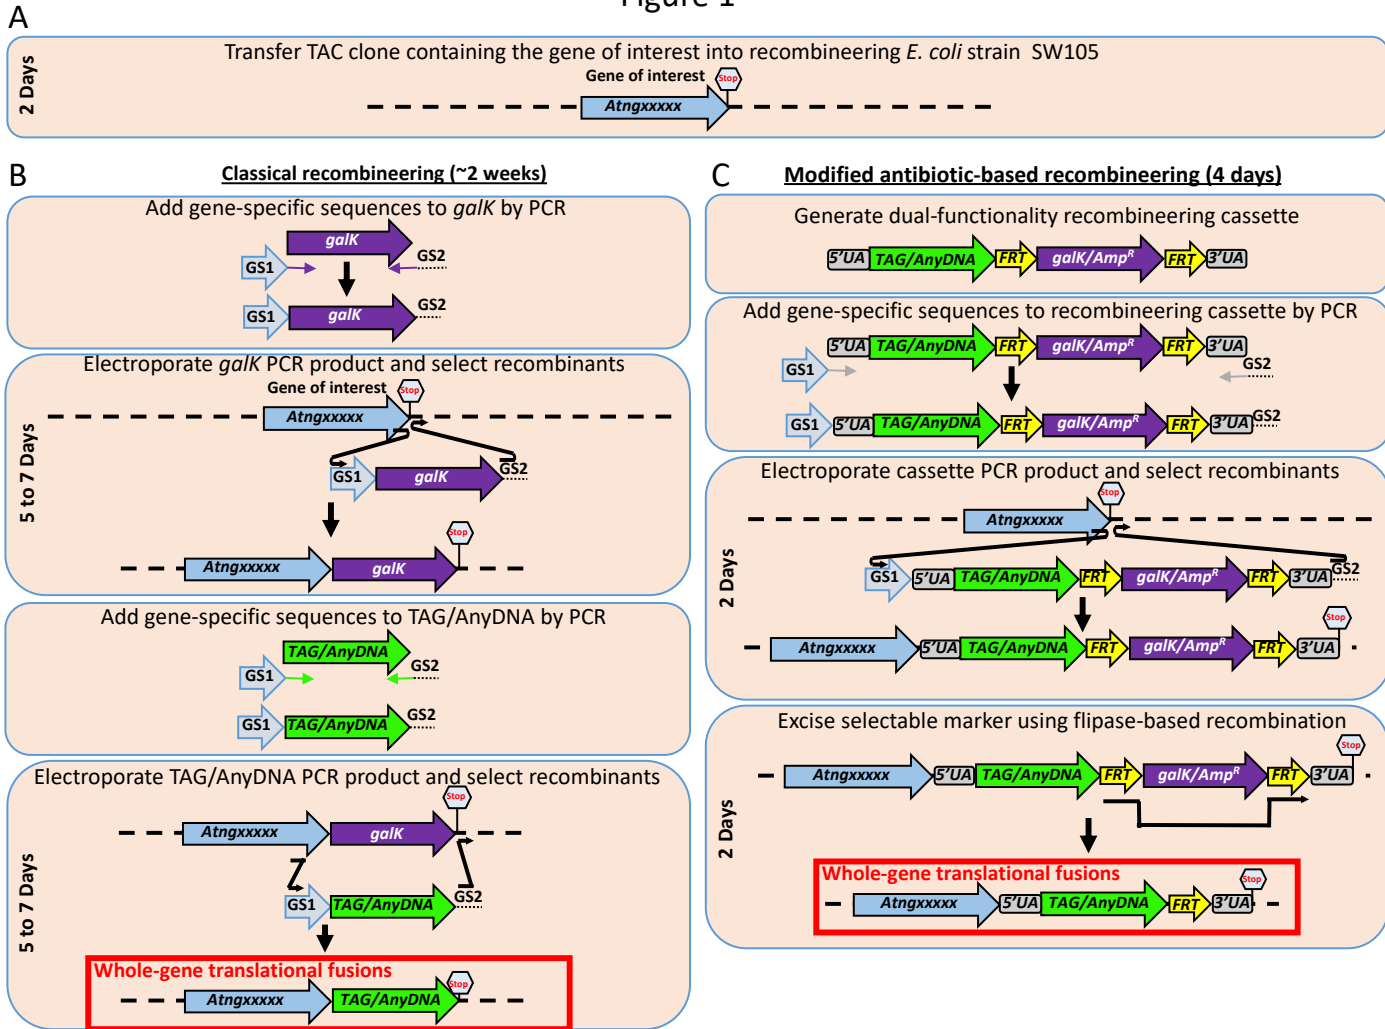

**Figure 1. Timeline comparison between the classical and new accelerated recombineering.**

**(A)** The first step in any recombineering experiment is the identification of a genomic clone (typically a TAC or a BAC) containing the gene or sequences of interest. **(B)** In the classical *galk*-based system, the *galk* positive/negative selectable marker is amplified using a pair of primers that contain at least 40 nucleotides of sequence corresponding to the sequence flanking the desired insertion site in the target genomic DNA clone. In this example, the amplification of the *galk* cassette with the GS1 and GS2 primers will result in the production of an amplicon (*GS1-galk-GS2*) that will target the *galk* selectable marker to the 3' of the gene just before the stop codon. The electroporation of this amplicon in a recombineering competent *E. coli* strain such as SW105 and the selection of the *galk*-positive colonies will result in a clone containing the *galk* marker just before the stop codon in the gene of interest (second panel). Using the same set of primers used to amplify the *galk* cassette, a *TAG/AnyDNA* cassette (such as *GFP*) is amplified (third panel) and used to replace *galk* by the *TAG/AnyDNA* sequence (bottom panel). This sequence replacement can be accomplished by electroporating the *GS1-TAG/AnyDNA-GS2* amplicon into the recombineering cells carrying the gene of interest tagged with *galk* and selecting for clones that lost *galk* in minimum media supplemented with 2-deoxy-galactose. Only *galk*-negative colonies will survive in the presence of this chemical. **(C)** The faster and user-friendly bifunctional cassette system combines the selectable marker (such as *galk* or an antibiotic resistance gene) and the tag of interest in a single cassette (top panel). By flanking the sequences of the selectable marker with the flipase (FLP) recognition target sites (*FRTs*), the selectable marker sequence can be readily removed post-insertion by a highly efficient *in vivo* FLP reaction. Similarly to the classical approach, the bifunctional large cassette, *GS1-5'UA-TAG/AnyDNA-FRT-galk/AmpR-FRT-5'UA-GS2* is first amplified with a pair of primers, GS1 and GS2 (second panel), to add the gene-specific sequences that will target the recombineering cassette to the desired location in the gene. By electroporating this cassette into the recombineering *E. coli* strain SW105 containing the gene of interest and selecting for, in this example, ampicillin-resistant clones, the bacteria with the desired construct can be efficiently and rapidly identified (third panel). Finally, the induction of FLP recombinase already engineered in the SW105 strain would result in the removal of the sequences corresponding to the selectable marker (bottom panel), leading to the tag containing the reporter or epitope of interest followed by a 36-nt-long *FRT*-containing scar that encodes 12 extra amino acids. The approximate time period required in each step is indicated. The GS1 primer should have the following structure: 5'-40nt just upstream of the nucleotide after which you want to insert your tag followed by the 5'UA sequence - ggaggtggaggtggagct -3'. Similarly, the GS2 primer should have the structure: 5'- 40nt corresponding to the reverse complement of the sequence just downstream of the nucleotide in front of which you want to insert your tag followed by the 3'UA sequence ggccccagcggccgcagcagcacc-3'

Figure 2

Applications for the "tag-generator" cassette

A Generation of new excisable antibiotic-based recombinering cassettes

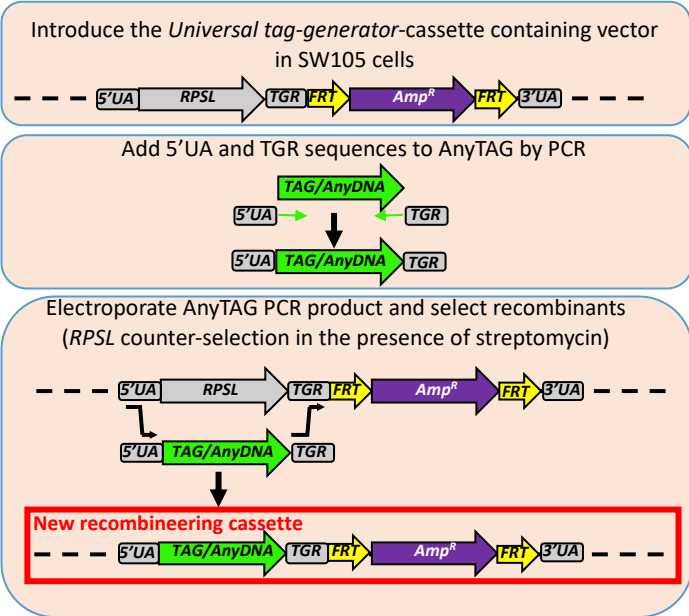

B Generation of scarless DNA sequence changes

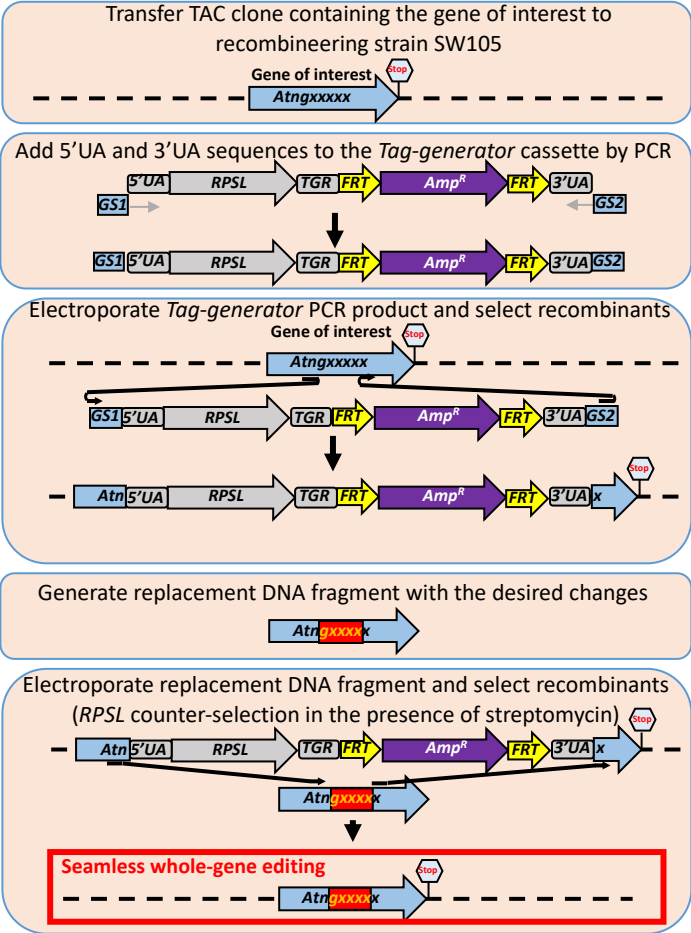

**Figure 2. Schematic representation of two applications for the *tag-generator* cassette.**

A *tag-generator* cassette consisting of the negative selectable marker gene *RPSL* and a positive selectable marker *Amp<sup>R</sup>* conferring ampicillin resistance can be used for the easy generation of new bifunctional recombineering cassettes containing any desired tag **(A)**, or to make precise gene editing (such as introducing point mutations, deletions, or insertions) in the gene of interest **(B)**. To facilitate the use of this *tag-generator* cassette, in addition to the negative (*RPSL*) and positive (*Amp<sup>R</sup>*) selectable markers, the construct contains the 5' and 3' universal adaptors (UA) that allow for the amplification of any recombineering cassette in our collection (see below) and the *TGR* sequence that allows for the in-frame insertion of any tag, making it possible to use the resulting cassettes in tagging experiments at any position in the gene of interest (N-terminal, C-terminal, or internal). Finally, this cassette also includes *FRT* sites flanking the sequences conferring ampicillin resistance (*Amp<sup>R</sup>*) allowing for the precise and efficient elimination of the selectable marker gene post-insertion. The *tag-generator* cassette can be used to construct new recombineering cassettes. **(A)** A ready-to-use SW105 *E. coli* strain containing a TAC clone that harbors the *tag-generator* cassette has been constructed (top panel). Using the primers TGF (5'-TAAAAAGGGTTCTCGTTGCTAAGGAGGTGGAGGTGGAGCT-3' in-frame with 20 nucleotides of the 5' of the new tag) and TGR (5'-gaaagtataggaactcccactgcagctccactgcagc-3' in frame with 20 nucleotides that anneal to the 3' end of the tag of interest), the tag of interest (*TAG/AnyDNA*) can be amplified generating the 5'UA-TAG/*AnyDNA*-TGR amplicon (middle panel). By electroporating this amplicon in the SW105 recombineering strain carrying the *tag-generator* cassette and selecting for the absence of *RPSL* (streptomycin-resistant colonies), a new bifunctional recombineering cassette for the tag of interest will be obtained (bottom panel). **(B)** The tag generator cassette can also be used in a two-step recombination procedure similar to the classical *galK* approach to make any type of sequence modification, such as seamless insertion of a tag, introduction of point mutations, etc. In this case, the process starts with the identification of the genomic clone containing the gene of interest (top panel). Using GS1 and GS2 primers (see figure 1) to PCR-amplify the *tag-generator* cassette, an amplicon containing the sequences flanking the point where the gene editing will take place is obtained (second panel). By electroporating this amplicon in SW105 recombineering cells carrying the BAC or TAC clone with the desired gene and selecting for ampicillin-resistant colonies, the gene of interest is tagged with the *tag-generator* cassette (third panel). Next, a replacement DNA construct containing the edited sequence (point mutations, deletions, insertions, etc. depicted as a red box in the fourth panel) flanked by long regions of homology to the gene of interest (100 to 200 base pairs on each side of the region to be edited are recommended) is produced, typically, by commercial DNA synthesis. When designing these constructs, it is important to consider that recombination can take place at any point within the regions of homology between the replacement sequence and the gene of interest tagged with the *tag-generator* cassette (bottom panel). By electroporating the replacement DNA and selecting for colonies resistant to streptomycin, the desired final product is obtained (bottom panel).

Figure 3

Applications for the "trimming" cassettes

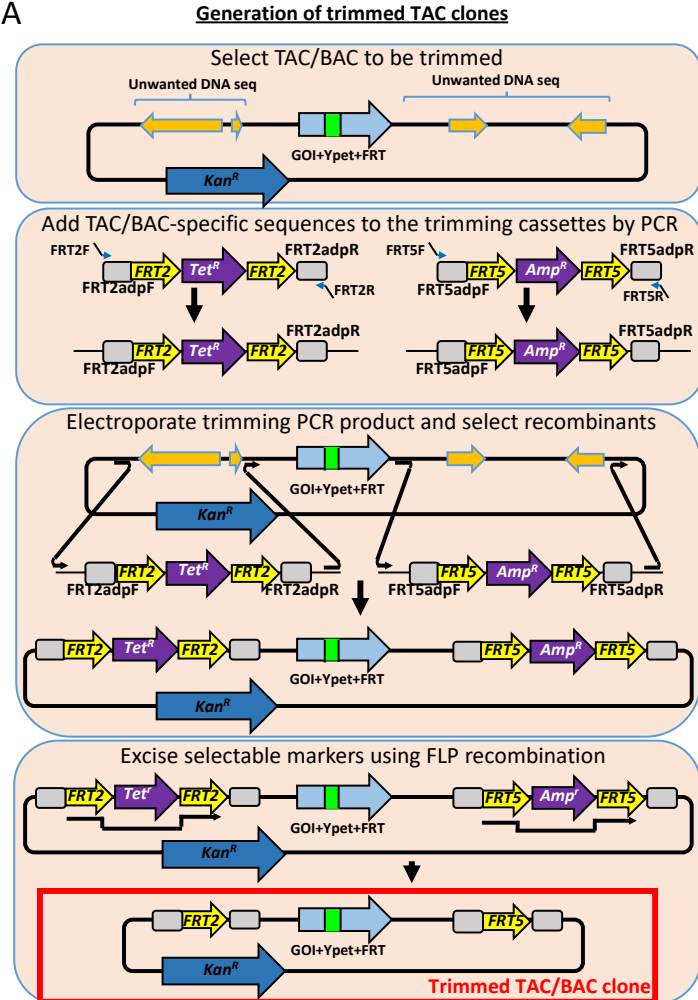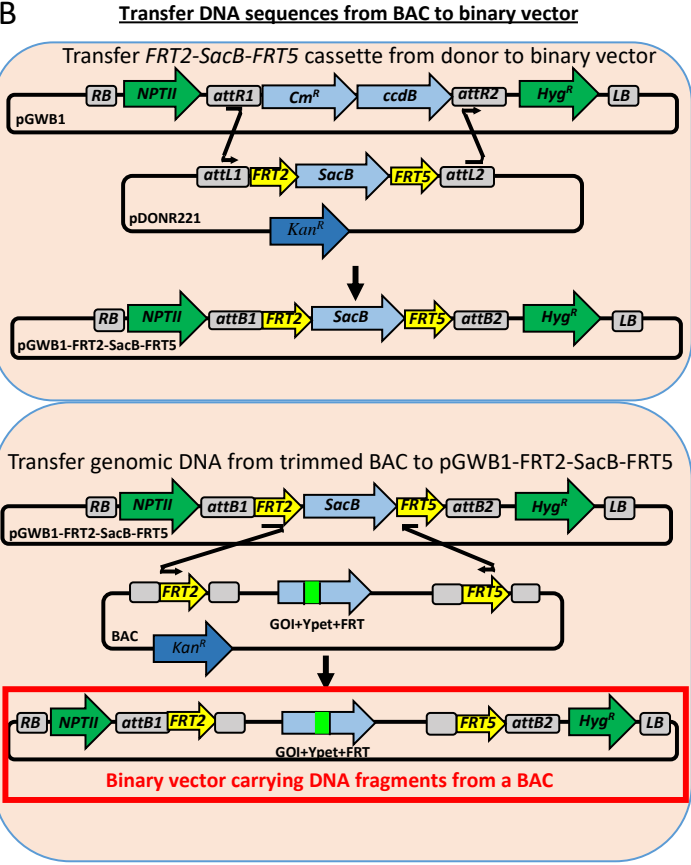

### Figure 3. Schematic representation of two applications for the trimming cassettes.

Two trimming cassettes, one conferring tetracycline resistance and another conferring ampicillin resistance, have been generated to facilitate the elimination of undesired sequences in TAC or BAC clones, as well as for the efficient transfer of large fragments of DNA from BAC clones to binary vectors. To make these actions possible, each antibiotic selectable marker in the trimming cassettes is flanked by a different pair of orthogonal *FRT* sequences, *FRT2* or *FRT5*, that not only allow for the elimination of the antibiotic-resistance sequences after the trimming process **(A)**, but also for the efficient *in vivo* transfer of large fragments of DNA from a BAC or TAC clone to a modified binary vector **(B)**. **(A)** The first step in the process of trimming a genomic sequence is to identify a BAC or TAC clone carrying the gene of interest (top panel). Using DNA for the ready-to-use *FRT2-Tet-FRT2* and *FRT5-Amp-FRT5* trimming cassettes as PCR templates and two pairs of primers, FRT2F/FRT2R, and FRT5F/FRT5R (see sequences characteristics below), two amplicons containing the sequences of the trimming cassettes flanked by 40 nucleotides homologous to the sequences flanking the region to be deleted in the target genomic DNA are produced by PCR (second panel). Electroporating these amplicons into electrocompetent SW105 cells carrying the TAC clone harboring the gene of interest and selecting for colonies resistant to both ampicillin and tetracycline results in the replacement of the undesired genomic DNA sequences by the trimming cassette sequences (third panel). Inducing the expression of the *FLP* recombinase present in the genome of the SW105 cells results in the elimination of the ampicillin and tetracycline selectable sequences, leaving behind a single *FRT2* and *FRT5* site at each flank, respectively (bottom panel). **(B)** The trimming product obtained in (A) contains the desired genomic DNA fragment flanked by two orthogonal *FRT* sites opening the possibility of using cassette-exchange strategies to move this potentially large DNA from the original BAC/TAC to a binary vector. To generate binary vectors suitable for this cassette-exchange reaction, we first generated a derivative of the Gateway pDONR221 vector containing the negative selectable marker *SacB* flanked by the head-to-toe *FRT2* and *FRT5* sites (top panel). Using this new vector, the *FRT2-SacB-FRT5* cassette can be easily transferred to any attR1-attR2-containing destination vector such as pGWB1 (top panel). To transfer the genomic DNA fragment flanked by the *FRT2* and *FRT5* sites to the pGWB1-*FRT2-SacB-FRT5* vector, SW105 cells carrying the trimmed BAC or TAC clone (from bottom panel in (A)) can be electroporated with the pGWB1-*FRT2-SacB-FRT5* vector. In the presence of sucrose (negative selection for the *SacB* gene) and hygromycin (positive selection for the pGWB1 backbone), the product of a successful cassette-exchange reaction can be efficiently selected. Dark green arrows indicate resistant genes that work both in plants and bacteria. The primers used to amplify the trimming cassettes have the following structure. FRT2 F: 5'-40nt corresponding to the sequence upstream of the nucleotide in front of which one wants to insert the *FRT2* site followed by the sequence -ttcaaatatgtatccgctca -3'. FRT2 R: 5'-40nt corresponding to the reverse complement sequence downstream of the nucleotide after which one wants to insert the *FRT2* site followed by the sequence -ttaccaatgcttaatcagtg -3'. FRT5 F: 5'-40nt corresponding to the sequence upstream of the nucleotide in front of which one wants to insert the *FRT5* site-aacgaatgctagtctagctg-3'. FRT5 R: 5'-40nt corresponding to the reverse complement sequence downstream of the nucleotide after which one wants to insert the *FRT5* site-ttagttgactgtcagctgtc -3'.

Figure 4

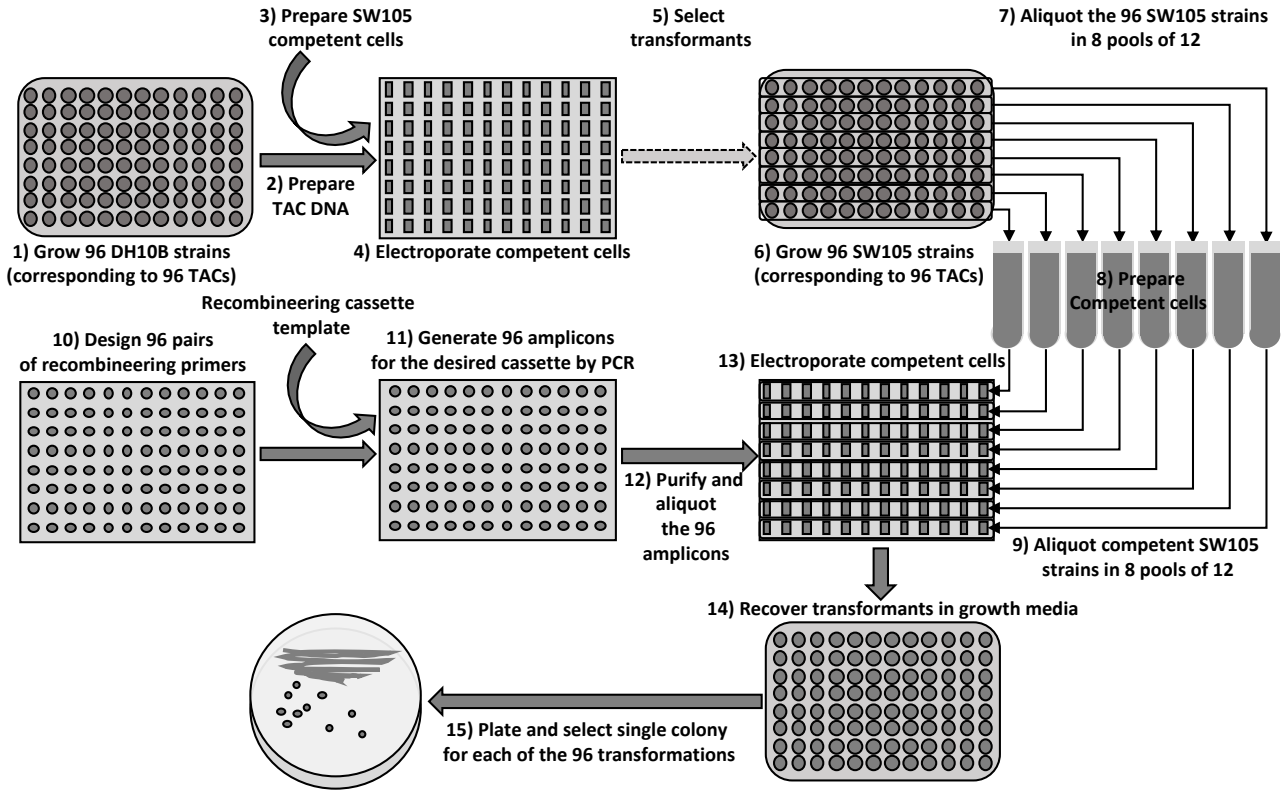

#### Figure 4. Schematic representation of the high-throughput recombineering pipeline.

The process starts by growing 96 DH10B strains carrying the desired TAC clones (best TAC clones from the two available *Arabidopsis* libraries for any given gene can be found in our genome browser at <https://brcwebportal.cos.ncsu.edu/plant-riboprints/ArabidopsisJBrowser>) in a 96-deep-well plate (1). The cells are pelleted by centrifugation and a 96-well-format alkaline-lysis DNA miniprep protocol is used to obtain DNA for the corresponding 96 TACs (2). Electrocompetent SW105 cells are prepared and aliquoted into a 96-well electroporator cuvette (3). DNA for each of the selected 96 TAC clones is added to the electroporation cuvette wells and electroporated into the SW105 competent cells (4). After the electroporation, cells are resuspended in LB and transferred to a 96-deep-well plate where they are allowed to recover before they are plated in selectable media. Individual clones grown in the selectable media are tested by PCR and arranged back into a 96-well format (dashed arrow indicates that several steps are not shown) (5). The SW105 strains carrying 96 TAC clones selected in step 5 are grown overnight in a 96-deep-well plate (6). Cells from the overnight culture are used to inoculate 8 cultures corresponding to pools of 12 clones each (7). Electrocompetent cells from each of the 8 pools of 12 clones are prepared (8). Aliquots of cells from each pool are placed into the wells of the corresponding rows of the 96-well electroporation cuvette. For example, from pool one, 12 identical aliquots would be placed in each of the wells of the first row of the 96-well electroporator cuvette and so on (9). In parallel, a pair of 60mers per gene are designed (primer sequences for generating N- and C-terminal amplicons for any gene and any of our ready-to-use recombineering cassettes can be obtained from our genome browser at <https://brcwebportal.cos.ncsu.edu/plant-riboprints/ArabidopsisJBrowser>) (10) and used to generate the corresponding 96 amplicons using the DNA from one of our ready-to-use cassettes as a template (11). The amplicons are purified by simple chloroform extraction and ethanol precipitation in a 96-well plate (12). The corresponding 96 amplicons are added to the electrocompetent cells and electroporated in the 96-well electroporation cuvette (13). As before, the cells are resuspended in LB and transferred to a 96-deep-well plate to allow them to recover (14). The cells from each transformation are then streaked in LB plates with the proper antibiotic (15). Individual colonies (one or two per construct) are examined by colony PCR using a combination of gene- and tag-specific primers and the integrity and fidelity of the recombination is checked by PCR fragment sequencing.



Figure 5

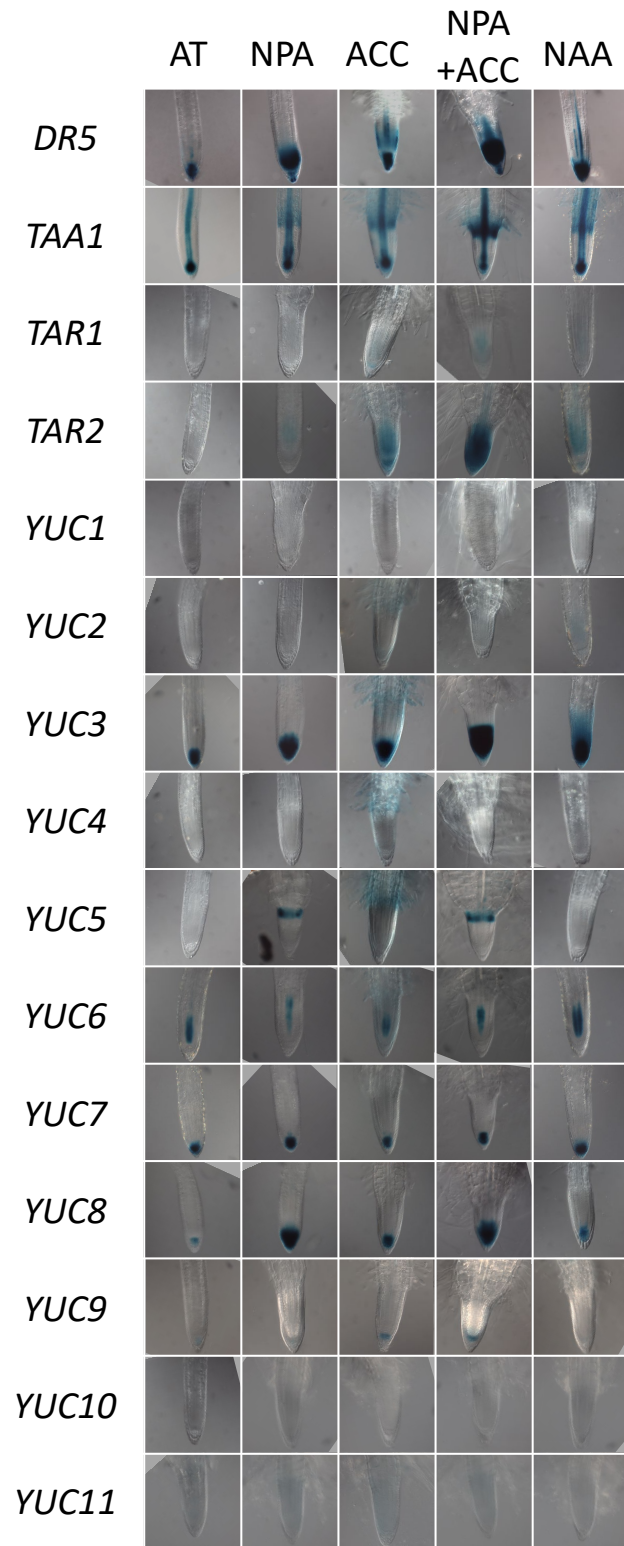

**Figure 5. GUS staining patterns of translational recombineering fusions of auxin biosynthesis genes and *DR5:GUS* in roots.**

Seedlings were germinated for three days in the dark in control AT media or in AT media supplemented with 10uM NPA, 10uM ACC, 10uM NPA + 10uM ACC, or 50nM NAA. Samples were optically cleared with ClearSee.

Figure 6

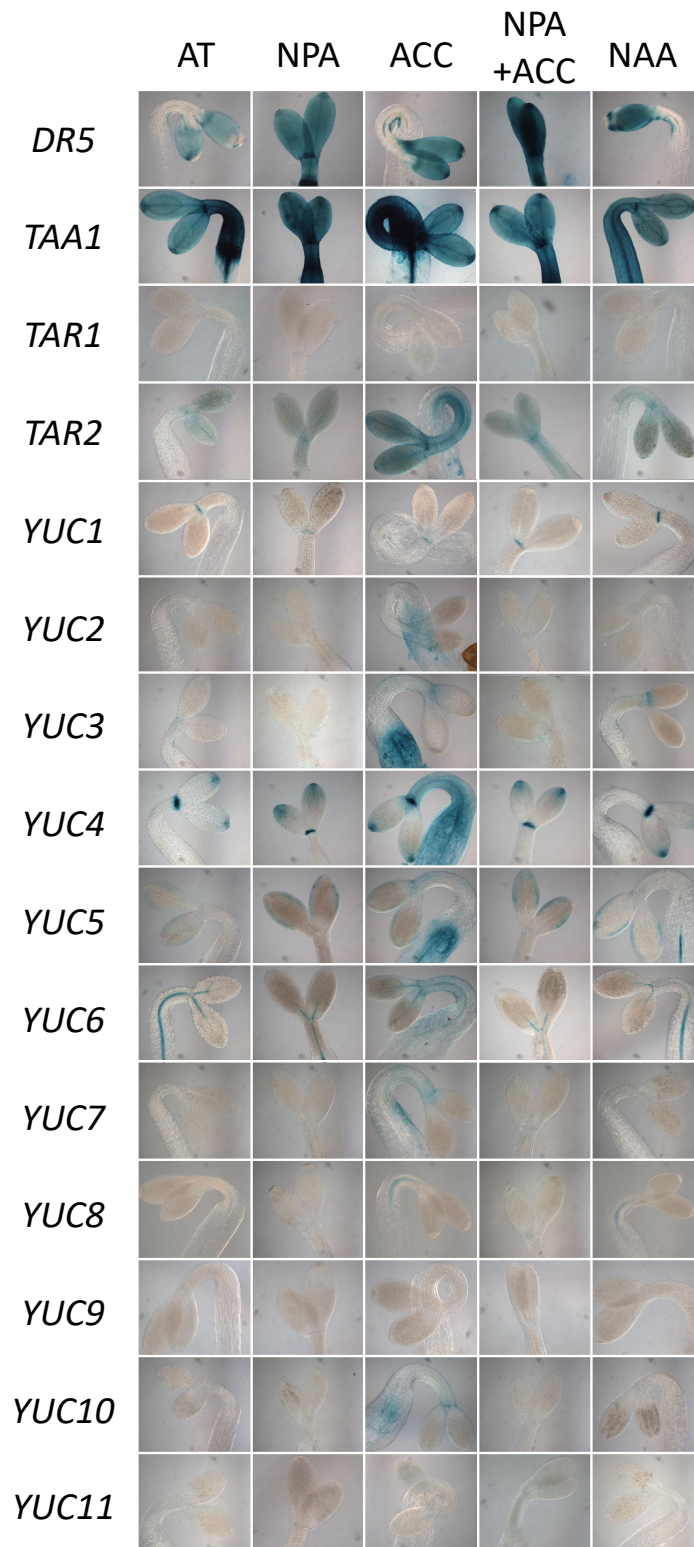

**Figure 6. GUS staining patterns of translational recombineering fusions of auxin biosynthesis genes and *DR5:GUS* in shoots.**

Seedlings were germinated for three days in the dark in control AT media or in AT media supplemented with 10uM NPA, 10uM ACC, 10uM NPA + 10uM ACC, or 50nM NAA. Samples were optically cleared with ClearSee.

Figure 7

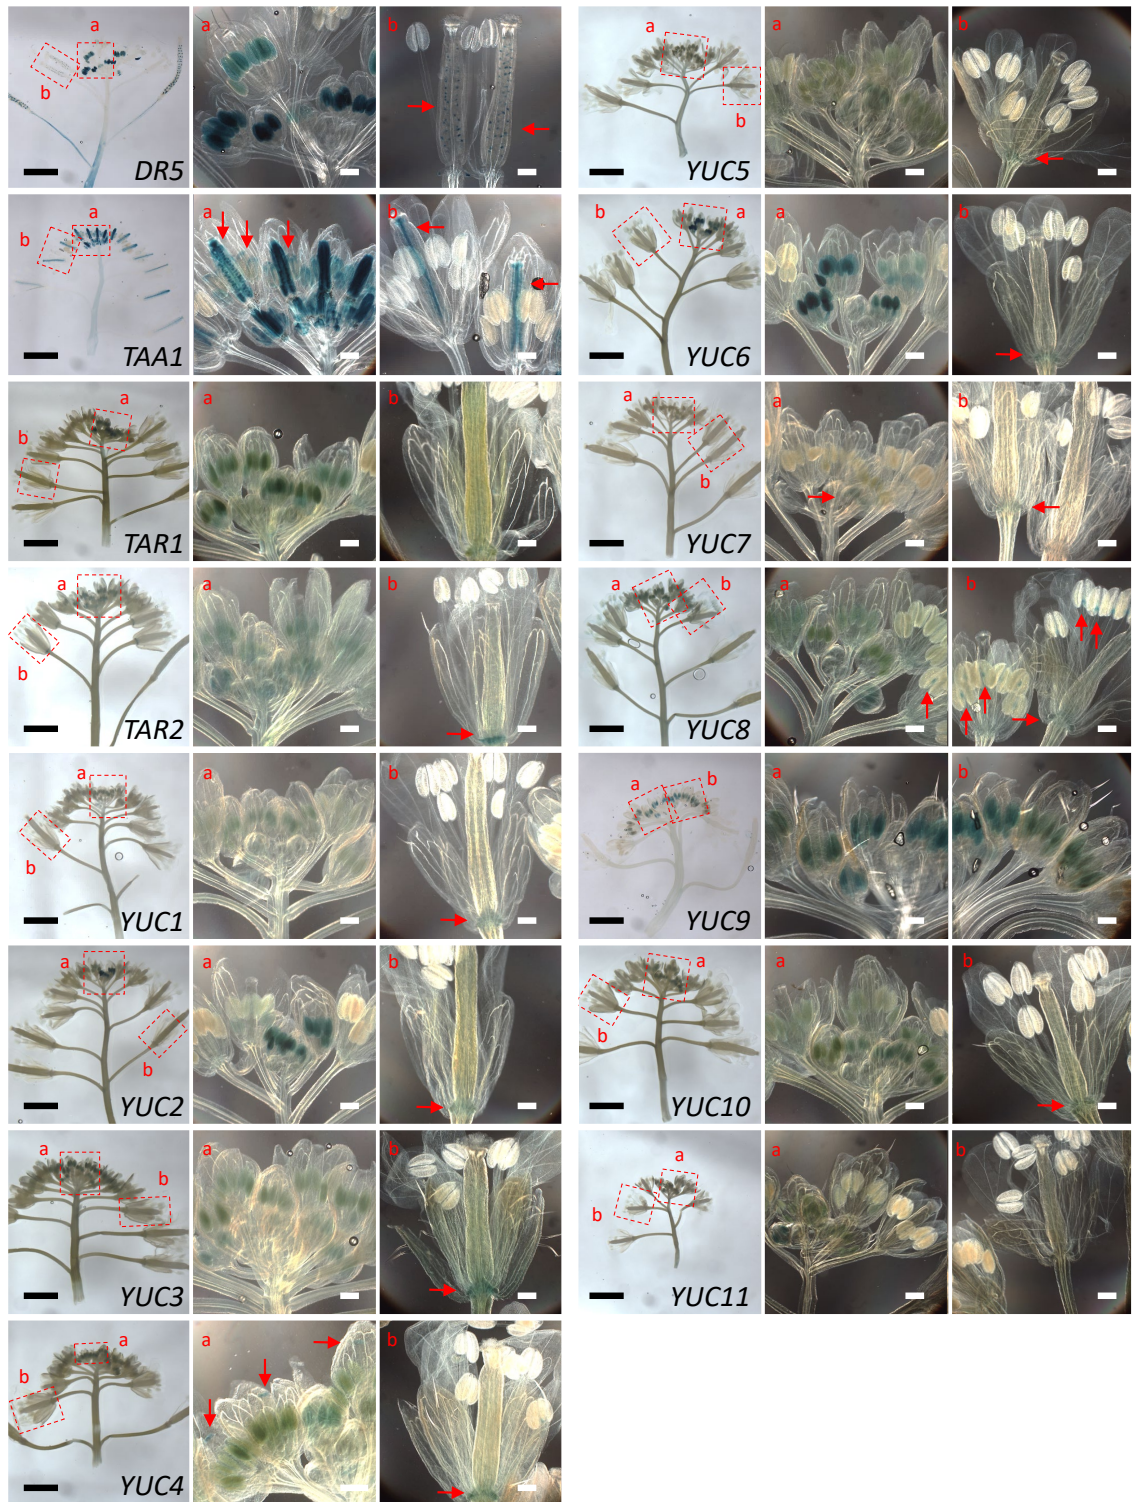

**Figure 7. GUS staining patterns of translational recombining fusions of auxin biosynthesis genes and *DR5:GUS* in inflorescences and flowers.** Images of individual flowers represent the enlarged versions of the boxed areas of inflorescences. Red arrows mark the GUS activity domains of interest highlighted in the text. Black scale bars in the inflorescence images correspond to 2.5 mm. White scale bars in the flower pictures represent 250  $\mu$ m. The samples of *DR5:GUS* and the *TAA1* recombining fusion with *GUS* have been optically cleared with ClearSee to enable visualization of GUS activity in the ovules and developing seeds.
